# 1 Reclaiming Motor Functions after Complete Spinal Cord Injury using 2 Epidural Minimally Invasive Brain-Computer Interface

3  
4 Dingkun Liu<sup>1#</sup>, Yongzhi Shan<sup>2#</sup>, Penghu Wei<sup>2#</sup>, Wenzheng Li<sup>1</sup>, Honglai Xu<sup>3</sup>, Fangshuo Liang<sup>1</sup>, Tao  
5 Liu<sup>3</sup>, Guoguang Zhao<sup>2\*</sup>, Bo Hong<sup>1\*</sup>

6  
7 <sup>1</sup>Department of Biomedical Engineering, School of Medicine, Tsinghua University, Beijing, China.

8 <sup>2</sup>Department of Neurosurgery, Xuanwu Hospital of Capital Medical University, National Medical  
9 Center for Neurological Diseases, Beijing, China.

10 <sup>3</sup>Neuracle Technology Co., Shanghai, China.

11

12 # Equal contribution

13 \* Corresponding author

14

15 E-mail: [hongbo@tsinghua.edu.cn](mailto:hongbo@tsinghua.edu.cn)

16

17 **Abstract:** Spinal cord injuries significantly impair patients' ability to perform daily activities  
18 independently. While invasive brain-computer interfaces (BCIs) offer high communication  
19 bandwidth to assist and rehabilitate these patients, their invasiveness limits broader adoption. We  
20 developed a minimally invasive BCI system that balances safety and communication bandwidth to  
21 restore hand functions. This system enables real-time, precise control of hand movements and  
22 effective hand function rehabilitation, requiring less than 10 minutes of calibration time and  
23 maintaining an average grasping detection F1-score of 0.91 over a 9-month period of home use. A  
24 tetraplegia patient caused by complete spinal cord injury was recruited in this study. With the  
25 assistance of the brain-computer interface, the patient can successfully perform object grasping and  
26 daily tasks involving hand functions, achieving a 100% success rate in an object transfer test.  
27 Additionally, the patient showed substantial neurological recovery through consecutive BCI upper  
28 limb training, regaining the ability to hold objects without BCI assistance. The patient demonstrated  
29 a 5-point improvement in ISNCSCI upper limb motor scores and a 27-point increase in the Action  
30 Research Arm Test (ARAT). Improvements in electrophysiological assessments point to a  
31 considerable recovery in impaired neural circuits. The cerebral-spinal channels established via this  
32 BCI system offer a promising new approach for treating spinal cord injuries and restoring hand  
33 functions.

34

35 **Keywords:** Minimally Invasive Brain-Computer Interface; Motor Imagery; Sensory Evoked  
36 Potentials; Functional Magnetic Resonance Imaging; Riemannian Geometry.

37

## 38 Introduction

39 Spinal cord injuries (SCI) can lead to permanent paralysis of the limbs, especially when the injury  
40 occurs in the cervical region, resulting in the loss of motor function in all four limbs. Implantable  
41 brain-computer interfaces (BCIs) present a novel solution to help patients regain some motor  
42 functions<sup>1,2</sup>. Combined with epidural spinal cord stimulation systems, these interfaces can  
43 facilitate functional rehabilitation<sup>3,4</sup>. Current research on implantable BCIs primarily focuses on  
44 increasing their communication bandwidth. However, the long-term efficacy and reliability of  
45 these systems are often constrained by safety concerns<sup>5,6</sup>. Few studies have investigated how to  
46 enhance the safety of implantable BCIs to achieve an optimal balance between communication  
47 bandwidth and safety. Additionally, BCIs combined with epidural spinal cord stimulation have  
48 been shown to enhance axonal excitability, induce closed-loop electrical activity, and promote  
49 active rehabilitation of the brain-spinal cord pathways. This combination can potentially restore  
50 voluntary walking abilities in patients<sup>3,7</sup>. However, it remains unclear whether the brain-spinal  
51 cord pathways can autonomously recover through BCI-induced sensory and motor feedback  
52 without external electrical stimulation.

53 In our previous research, we designed and validated a brain-computer interface (BCI) system  
54 called NEO (Neural Electrical Opportunity) using epidural electrodes and bidirectional wireless  
55 communication in animal models. The NEO system ensures long-term safety and effectiveness  
56 through its battery-free, bidirectional design and epidural electrodes that keep the brain tissue  
57 intact.

58 In this study, we utilized the NEO system to develop a long-term hand movement assistance  
59 system for a patient with complete C4 spinal cord injury resulting in quadriplegia. We investigated  
60 whether neural rehabilitation could be achieved through the coupling of cortical descending  
61 control signals and ascending sensory signals at the injury site, without relying on external  
62 electrical stimulation.

## 63 The Epidural Minimally Invasive BCI

64 To create a balanced bridge between bandwidth and safety in brain-upper limb control, we  
65 designed an epidural wireless minimally invasive brain-computer interface (BCI) system, named  
66 NEO.

67 The implantable part of the NEO system consists of a titanium alloy implant, a coil, and two  
68 electrode adaptors extending outward. The entire system is sealed with silicone material (Fig. 1b).  
69 The epidural electrodes are connected to the implant via the electrode adaptor, with each electrode  
70 featuring four bidirectional contacts capable of both recording and stimulating. These electrodes  
71 have a diameter of 3.2 mm and a center-to-center distance of 8 mm. The system operates at a  
72 sampling rate of 1 kHz. It includes two sets of coils: the first set supplies power through near-field  
73 coupling, and the second set transmits collected neural signals via Bluetooth.

74 This design has two main characteristics. First, it employs minimally invasive epidural electrodes.  
75 These electrodes, placed on the dura mater, without penetrating the dura, preventing a strong  
76 immune response and ensuring long-term effectiveness. Second, the system utilizes bidirectional  
77 wireless communication for both power and information transmission (Fig. 1c). Wireless  
78 communication reduces the risk of infection by eliminating the need for open wounds. The  
79 implant does not contain a battery; instead, it is powered wirelessly via the coils, which also  
80 handle bidirectional data transmission. This battery-free design ensures that the device's lifespan  
81 is not limited by battery life. While a similar design has been widely adopted in cochlear  
82 implants<sup>8</sup>, it has not yet been reported in the field of implanted brain-computer interfaces.

83 Signals are received by a relay attached to the arm and transmitted to a computer via Bluetooth or  
84 WIFI. The computer decodes the patient's motor control signals continuously from the neural data  
85 and drives an external pneumatic glove (Fubo Co.) (Fig. 1a, Extended Data Video 1). When the  
86 patient imagines grasping and holding, the pneumatic glove grasps; when the patient imagines  
87 relaxing, the glove extends.

## 88 Precise Implantation of Minimally Invasive BCI

89 This study is part of a clinical trial for the implantable closed-loop BCI system (NEO)  
90 ([clinicaltrials.gov](https://clinicaltrials.gov), NCT05920174), which was approved by the Xuanwu Hospital Ethics  
91 Committee in April 2023. We recruited a patient who suffered a spinal cord injury in a car  
92 accident more than 10 years before, resulting in limited hand motor function, making grasping,  
93 holding, and pinching actions impossible (Extended Data Video 2). Prior to NEO implantation,  
94 the patient underwent a neurological assessment and was diagnosed with complete C4 spinal cord  
95 injury (AIS-A, Extended Data Table 1, Extended Data Fig. 1).

96 To obtain the most informative neural signals related to hand grasping with a minimal number of  
97 electrodes, we performed preoperative planning for the BCI electrode implantation using  
98 functional MRI (fMRI). Research indicates that the transmission of ascending signals is crucial for  
99 SCI rehabilitation<sup>9</sup>. Therefore, our paradigm included fMRI imaging of both active and passive  
100 grasping attempts. The active grasping paradigm requires the subject to perform motor imagery  
101 based on cues, whereas the passive grasping paradigm requires the subject to perceive the  
102 sensation of the experimenter assisting him in grasping and releasing. The active grasping  
103 paradigm localized the sensory-motor area responsible for the patient's hand, while the passive  
104 grasping paradigm assessed the transmission of ascending sensory signals (Extended Data Fig. 2).  
105 Additionally, we collected CT and structural MRI images of the patient to determine the  
106 implantation site.

107 The significant activation regions were projected from the fMRI onto a 3D model of the cortex,  
108 using 3D modeling software to simulate electrode placement (Extended Data Fig. 2). The position  
109 of the implant was determined using skull structure obtained from CT images, selecting an area  
110 with suitable thickness. The final plan was then output to a surgical navigation system to guide the  
111 implantation procedure.

112 The minimally invasive BCI implantation surgery was completed in October 2023. Conducted  
113 under general anesthesia, a coronal incision was made on the left scalp to place the internal  
114 device, coil, and electrode pads. Following the preoperative plan, a circular window was created  
115 in the skull, exposing the dura mater, and the electrodes were sutured onto the dura mater  
116 according to the planned positions. The bone flap was then repositioned and secured. A 3-4 mm  
117 deep groove was created on the skull surface to embed the implant, which was fixed using bone  
118 screws, and the incision was sutured closed. The patient was discharged within 24 hours after all  
119 clinical observations were completed.

120 Postoperatively, we extracted the electrode positions from the patient's postoperative CT images  
121 and registered them to the preoperative MRI images, obtaining a map of the eight electrode  
122 positions. The first four electrodes were placed above the precentral gyrus, while the latter four  
123 were above the postcentral gyrus. Electrodes 2-3 in the precentral gyrus and electrodes 7-8 in the  
124 postcentral gyrus covered the most prominent activated hand areas identified by fMRI during hand  
125 movement imagination (Fig. 1d, Extended Data Fig. 2).

## 126 Long-term Characteristics of Epidural Signals

127 Generally, brain electrophysiological recordings can be divided into three distinct levels: scalp  
128 electroencephalography (EEG), subdural electrocorticography (sECoG), and action potential  
129 recordings. These methods vary in safety and signal quality, with EEG being the safest but having  
130 the lowest signal quality, and action potential recordings being the least safe but offering the  
131 highest signal quality. We propose that epidural electrocorticography (eECoG) represents a fourth  
132 type, which theoretically provides higher safety than sECoG<sup>6</sup> and is considered minimally  
133 invasive. Its spatio-temporal-spectral characteristics are distinct from the other three methods.  
134 Currently, there is limited information on long-term eECoG recordings, and we have obtained  
135 substantial minimally invasive eECoG signals for the first time. By analyzing these signals' spatio-  
136 temporal-spectral characteristics, we can guide the design of decoding methods for epidural  
137 minimally invasive BCIs.

138 Fig. 1e shows the average event-related spectrum perturbation (ERSP) pattern of 1700 trials of  
139 imagined hand grasping versus rest by the patient. The spectrum pattern exhibits a typical dual-  
140 frequency feature, including low-frequency (15-50 Hz) event-related desynchronization (ERD)  
141 and high-frequency (>50 Hz) event-related synchronization (ERS).

142 We compared the spatio-temporal-spectral characteristics of the patient's eECoG with subdural  
143 ECoG datasets<sup>10</sup>, the patient's scalp EEG, and a published EEG dataset<sup>11</sup>. Scalp EEG showed no  
144 significant ERSP from the low gamma (>40 Hz) frequency band onwards ( $p=0.42$ , Fig. 2a). Both  
145 eECoG and sECoG exhibited low-frequency ERD and high-frequency ERS effects. It is  
146 particularly noteworthy that the frequency upper limit of eECoG can exceed 200 Hz, which is  
147 significantly higher than that of scalp EEG (Fig. 2a). The power spectral density of eECoG was  
148 lower than that of sECoG in different frequency bands but higher than that of scalp EEG in the  
149 high-frequency range (20-75 Hz) (Fig. 2b). Spatially, by comparing the relationship between  
150 channel correlation and electrode distance, we qualitatively verified the spatial resolution

151 differences among different levels of brain electrophysiological recordings. The correlation  
152 between EEG channels decreased slowly with increasing electrode distance, indicating lower  
153 spatial resolution. The correlation between sECoG channels decreased most rapidly with  
154 increasing electrode distance, indicating the highest spatial resolution, with eECoG showing  
155 moderate spatial resolution (Fig. 2c).

156 The quality of long-term eECoG signals improved continuously with training. Spatially, electrode  
157 8 showed the strongest high gamma (HG) response during imagined hand movement, and all  
158 electrodes' HG responses significantly increased over nine months of training ( $p < 0.001$ , Fig. 2d).  
159 The ERSP effects of electrodes in both the precentral and postcentral gyrus during imagined hand  
160 movement also continuously enhanced with training (Fig. 2e-f). Additionally, the HG energy  
161 during resting and movement states significantly increased with time ( $p < 0.001$ , Fig. 2h). We  
162 continuously measured the impedance changes to reflect alterations in the patient's intracranial  
163 environment post-surgery. The results showed only a slight increase in electrode impedance ( $< 600$   
164  $\Omega$ ), which gradually stabilized (Fig. 2g).

## 165 BCI-assisted Continuous Natural Grasping

166 In our previous analysis, we confirmed the wideband characteristics of minimally invasive  
167 eECoG, which provides spatial resolution between sECoG and EEG. We also observed that the  
168 signal amplitude improves with continuous training. To accurately decode the patient's natural  
169 grasping movements and achieve motor assistance with the BCI, our decoder design needs to  
170 integrate multi-band frequency information, restore source space activity, and maintain invariance  
171 to signal amplitude over long periods.

172 Firstly, eECoG features were extracted by combining spatial and spectral information into a  
173 covariance matrix, utilizing scale-invariant Riemannian metrics for classification to address  
174 long-term distribution shift in neural features<sup>12</sup> (see Methods: Spatio-Spectral Riemannian  
175 Geometry Decoding Method). Secondly, a hidden Markov model (HMM) was employed to  
176 manage the temporal dependencies of continuous grasping actions, ensuring prediction  
177 accuracy and stability (Extended Data Fig. 3 and 4). This approach was compared with two  
178 commonly used BCI decoding methods: a linear method<sup>1</sup>, which uses linear spatio-temporal-  
179 spectral features, and the Common Spatial Pattern (CSP) method<sup>13</sup>, which uses multi-band  
180 spatial patterns (see Methods: The Control Decoding Methods). Both methods are widely  
181 used in BCI applications.

182 The BCI calibration was completed within 10 minutes using a block design paradigm alternating  
183 between imagined grasping and resting. For the BCI testing and rehabilitation training task, the  
184 patient was instructed to use motor imagery to control a pneumatic hand to move an object from  
185 the center of a 3x3 grid to one of the eight surrounding cells (Fig. 3a, Extended Data Fig. 5).  
186 After 10 minutes of calibration, the patient achieved a decoding accuracy of 94% (Chance level:  
187 77%) and a grasp event detection F1 score of 0.8 (Chance level: 0.09). Despite the continuous  
188 increase in the patient's high-frequency amplitude, indicating improving signal quality, this  
189 amplitude change affects the classification accuracy of linear decoders but has minimal impact on

190 the AIRM<sup>12</sup>. Over nine months, the patient's grasp event F1 score steadily increased, surpassing  
191 0.9 after three months. The long-term stability of the Riemannian method was superior to both  
192 Linear and CSP methods, with the F1 score consistently improving and feature distribution shifts  
193 being less pronounced (Fig. 3i, Extended Data Fig. 6), and an average latency of  $1.23 \pm 0.33$ s. In  
194 the 3x3 grid test, the success rate was 100% within 10 seconds with BCI assistance, compared to  
195 35% without it (Fig. 3b-d, 181-185 days after implantation, Extended Data Video 3). The model's  
196 consistent and accurate predictions during the autonomous grasping sessions demonstrate the  
197 effectiveness of the BCI system. With BCI assistance, the grasping time was evenly distributed  
198 between the start and end points, while without assistance, it was concentrated at the start point,  
199 indicating improved grasping efficiency with BCI assistance (Fig. 3e-f, h). We compared the  
200 performance of our system using EEG collected from the subject. The grasp event F1 score for the  
201 EEG-based decoder was only  $0.16 \pm 0.11$  (s.d.) (Chance level: 0.07), while for the eECoG it was  
202  $0.90 \pm 0.06$  (s.d.) (Chance level: 0.09) (Fig. 3g).

203 In a home setting, the BCI can assist with various tasks requiring grasping. However, activities  
204 like eating and drinking generate significant electromyographic (EMG) noise, which interferes  
205 with the decoder. Since the spatial distribution of EMG noise differs from that of grasping  
206 movements, the Riemannian geometry method, which is highly sensitive to spatial patterns, can  
207 filter out noise without supervised training (Extended Data Fig. 7). Compared to the Riemannian  
208 geometry method, the Linear and CSP methods had a false activation rate (FAR) of 100% during  
209 chewing, while the Riemannian geometry method had a FAR of only 20% (Fig. 3j). Using the  
210 Riemannian geometry decoding method, the patient could perform grasp-related tasks such as  
211 eating and drinking with BCI assistance (Extended Data Video 4, 267 days after implantation).

## 212 Hand Function Rehabilitation and Electrophysiology Assessment

213 The regeneration of spinal connections induced by neuroplasticity from electrical activity has been  
214 demonstrated in relevant literature<sup>3,14,15</sup>. In this study, electrical activity was generated by  
215 descending signals actively sent from the brain and ascending signals from muscle sensory  
216 feedback. This process is more natural and aligns better with the patient's physiological patterns  
217 compared to direct electrical stimulation. Indeed, during nine months of continuous training,  
218 significant neurophysiological and functional recovery was observed in the patient.

219 Somatosensory Evoked Potentials (SEPs) are used to assess sensory information conduction. SEPs  
220 are elicited by electrically stimulating peripheral nerves and recording the resulting electrical  
221 activity as it travels through the sensory pathways to the corresponding areas of the brain, such as  
222 the precentral and postcentral gyri. Thus, SEPs reflect the transmission of sensory information  
223 from peripheral receptors through the spinal cord to the brain, making them a useful tool for  
224 evaluating the extent of spinal cord injury and the progress of recovery<sup>16,17</sup>. SEP testing involves  
225 stimulating the median, radial, and ulnar nerves of the patient's right arm (corresponding to C6-  
226 T1, C5-C8, and C8-T1, respectively) with a constant current and recording the SEPs from the  
227 precentral and postcentral gyri using the NEO epidural electrodes (Fig. 4a). Changes in SEP  
228 signals from the radial, median, and ulnar nerves correspond to the recovery status of the sensory  
229 pathways at different levels of the spinal cord. The strongest and most stable SEP responses were

230 observed in channel 5 (Fig. 4b, Extended Data Fig. 8). The radial nerve corresponds to spinal  
231 segments above the injury level, the median nerve is near the injury level, and the ulnar nerve is  
232 below it. Consequently, it is expected that SEPs from the radial nerve will not show significant  
233 growth during recovery, while SEPs from the median nerve will show some improvement, and  
234 SEPs from the ulnar nerve might show less improvement. Over 9 months, the amplitude of SEPs  
235 elicited by median nerve stimulation in channel 5 increased significantly, whereas the radial nerve  
236 did not show significant changes (Fig. 4c). Comparing the first and ninth months, the mean  
237 amplitude of early (15-35ms) and late (40-80ms) components of median nerve SEPs increased  
238 significantly across most channels. The late component of ulnar nerve SEPs increased  
239 significantly in most channels, but the early component did not show a significant increase. The  
240 radial nerve showed no significant increase for either component in all channels but channel 4,  
241 which showed a significant increase for late component (Fig. 4d-e, bootstrap permutation test, fdr  
242 corrected, statistical p-values in Extended Data Table 2).

243 The patient's neurological scale assessments and hand function evaluations corresponded with the  
244 SEP changes. However, due to the patient's use of Baclofen and Pregabalin in the sixth month,  
245 there was a notable decrease in sensory and motor scores. The patient's upper limb motor score on  
246 the International Standards for Neurological Classification of Spinal Cord Injury (ISNCSCI) scale  
247 increased by 5 points over nine months, with changes concentrated in the C5-C8 segments, and  
248 the motor level dropping from C5 to C6. The sensory score increased by 8 points, peaking at 11  
249 points in the fifth month, mostly in the C5-T4 segments (Fig. 4f-g, Extended Data Table 1). The  
250 Action Research Arm Test (ARAT) scale<sup>18</sup>, which evaluates hand functions, including grasp, grip,  
251 pinch and gross movements, showed a 16-point improvement in the patient's right hand and a 11-  
252 point improvement in the left hand after nine months. The main improvement was in the grasp  
253 score, with the trained right hand showing more improvement than the left hand (Fig. 4i, Extended  
254 Data Table 3). For example, in the ARAT grasp test, the patient was able to grasp a 5 cm wooden  
255 block faster in the fifth month compared to the third month (3.9 s vs. 6.1 s) and was also able to  
256 successfully grasp a 7.5 cm wooden block in the fifth month (Fig. 4h, j-k). The patient completed  
257 the ARAT grasping part test before the surgery. Compared to the preoperative results, the  
258 grasping speed and success rate for 2.5 cm and 5 cm wooden blocks were significantly improved  
259 five months after the surgery (Extended Data Video 2).

## 260 Discussion

261 This study presents the first human trial of a bidirectional, wireless, and minimally invasive  
262 epidural BCI system. We developed a novel brain-spine rehabilitation pathway entirely based on  
263 the patient's autonomous neural activities. This pathway enabled a patient with a complete C4  
264 spinal cord injury to regain voluntary hand grasping ability. Furthermore, active rehabilitation  
265 training using the BCI facilitated a stable recovery of this autonomous grasping function.  
266 Significant and consistent improvements were observed in neurological scales, hand function  
267 assessments, and electrophysiological tests.

268 Implantable brain-computer interfaces often face a trade-off between communication bandwidth  
269 and safety. Typically, a higher channel number leads to higher bandwidth but lower safety. The

270 wireless, minimally invasive epidural BCI system developed in this study, featuring wireless  
271 power and transmission with a battery-free, closed-wound design, ensures long-term safety and  
272 stability for home use while effectively facilitating hand function restoration and rehabilitation.  
273 Although BCIs based on microelectrode implants can achieve similar functions, their long-term  
274 stability is limited by issues such as electrode displacement and glial cell encapsulation,  
275 necessitating frequent recalibration. Some BCIs using subdural cortical electrodes have been  
276 reported to maintain high long-term stability, requiring no recalibration for 2-6 months<sup>19,20</sup>.  
277 However, subdural electrodes pose a higher risk of adverse effects such as hematomas,  
278 intracranial hemorrhage, brain infarction, and cerebral edema due to direct pressure on brain  
279 tissue<sup>6,21</sup>. In contrast, minimally invasive epidural brain-computer interfaces offer significant  
280 advantages in long-term stability. The electrodes are placed outside the dura mater, providing  
281 structural support without damaging or compressing brain tissue. Consequently, the minimally  
282 invasive epidural electrodes exhibit better long-term stability, with signal quality improving over a  
283 nine-month period. Additionally, decoding performance remains stable over nine months with  
284 only 10 minutes of calibration.

285 In this study, we demonstrated for the first time that a minimally invasive BCI system, relying  
286 solely on the patient's autonomous sensory ascending and motor descending signals, can induce  
287 spinal circuit reconstruction, leading to the rehabilitation of upper limb sensory and motor  
288 functions in a patient with complete spinal cord injury. Previous studies have validated the  
289 effectiveness of brain-controlled spinal cord injury rehabilitation systems based on this  
290 principle<sup>3,22,23</sup>, but they largely depend on electrical stimulation of limbs<sup>23</sup> or the spinal cord<sup>3</sup> to  
291 induce recovery. Our research confirmed the feasibility of directly using the body's own ascending  
292 and descending signals to facilitate upper limb rehabilitation. Additionally, there is a hypothesis  
293 that electrical stimulation of the spinal cord enhances the excitability of afferent nerves, thereby  
294 inducing neural circuit remodeling<sup>7,15</sup>. This method complements our approach and could be  
295 combined in the future to improve brain-controlled upper limb rehabilitation outcomes.

296 Our study also established a quantitative assessment method for neural function rehabilitation  
297 based on SEP (somatosensory evoked potential) using NEO system. The trend of changes in the  
298 amplitude of different SEP components was highly consistent with the patient's rehabilitation  
299 progress. At the sixth month, the patient was taking Baclofen and Pregabalin, both of which have  
300 inhibitory effects on the central nervous system. These medications exert global suppression on  
301 the central system, while SEP, as a primary cortical response to sensory information, is  
302 theoretically less affected by such medications compared to higher-level brain activities involved  
303 in subjective sensory perception. The results showed that SEP test outcomes were less disturbed  
304 than the sensory scores on the ISNCSCI scale, more accurately reflecting the connectivity of  
305 spinal neural circuits. Given that similar medications are commonly used by SCI patients, the  
306 stability of SEP provides a better assessment of the patient's sensory perception.

307 This study is a prospective investigation of a novel brain-computer interface, reporting results  
308 from a single subject. Consequently, the rehabilitation effects for patients with different injury  
309 locations or severities remain uncertain. However, our approach theoretically holds potential for  
310 application to other spinal cord injury patients. Firstly, the case we reported is an AIS-A level  
311 case, representing the most severe level of spinal cord injury. Patients with less severe injuries



312 would have more residual connections, providing better conditions for rehabilitation. Secondly,  
313 our system is highly reliable, with high decoding accuracy and long-term stability, making it  
314 highly scalable. Similar patients can quickly calibrate and use the system at home for long-term,  
315 effective rehabilitation training.

## 316 Methods

### 317 Clinical Protocol and Subject

318 This study was approved by the ethics committee of Xuanwu Hospital in April 2023 and  
319 registered for international and domestic clinical trials of implanted medical devices  
320 (NCT05920174) to conduct research on the implanted closed-loop brain-computer interface  
321 system (NEO). The surgery was performed at Xuanwu Hospital, with other related studies  
322 conducted at Tsinghua University and the patient's home. Our study includes three main phases:  
323 preoperative functional screening, surgery, a one-month calibration and adjustment period, and an  
324 eight-month BCI assisted active rehabilitation training period. The rehabilitation training involved  
325 a total of 100 sessions, each lasting 1-3 hours, personalized according to the patient's progress. In  
326 the 9<sup>th</sup> month, the training load was doubled to maximize the patient's recovery outcomes.

327 The participant is a male who sustained a spinal cord injury more than 10 years ago due to a car  
328 accident. The participant signed a written informed consent before participation. Moreover, the  
329 participant gave his consent for the material depicting himself to appear in the contribution and to  
330 be published in the journal and associated works without limit on the duration of publication, in  
331 any form or medium.

332 Before the surgery, the patient underwent a neurological impairment assessment, currently  
333 diagnosed as a complete C4 spinal cord injury (ASIA-A, Extended Data Table 1). The patient's  
334 muscle tone was rated at level 2-3 on the Modified Ashworth Scale (MAS), indicating an increase  
335 in muscle tone that affects passive movement within the range of motion. The patient reported  
336 taking Baclofen (10mg/day) and Pregabalin (75mg/day) to relieve spasms at the sixth month post-  
337 surgery. This symptom has persisted since the injury and is unrelated to the BCI implant.

### 338 Functional MRI Localization

339 Before the implantation surgery, the subject underwent a head MRI on a 3.0T scanner (Siemens,  
340 Prisma) to locate brain areas associated with hand sensory and motor functions. Functional MRI  
341 (fMRI) was acquired using a gradient echo planar imaging (EPI) sequence with the following  
342 parameters: matrix size 100×100, resolution 2×2×2 mm<sup>3</sup>, repetition time (TR) 2 s, echo time (TE)  
343 30 ms. The scan covered the entire brain with 72 slices. T1-weighted MRI structural images were  
344 acquired using a magnetization-prepared rapid gradient-echo (MPRAGE) sequence with  
345 parameters: matrix size 256×256, resolution 1×1×1 mm<sup>3</sup>, and 208 slices.

346 The fMRI paradigm was used to locate the subject's sensorimotor areas related to hand movement.  
347 The paradigm consisted of two parts. The first part involved passive movement, where two  
348 experimenters assisted the subject with passive fist clenching on the left and right sides at a

349 frequency of approximately 0.5 Hz. This was designed to test whether sensory information could  
350 be transmitted to the cortex, indicating the condition of the subject's ascending pathways. The  
351 second part involved motor imagery, where the subject was asked to imagine moving their left or  
352 right hand in a familiar manner. This was used to locate the hand motor areas in the primary motor  
353 (M1) and primary sensory (S1) cortices. The block design included two alternating conditions:  
354 movement and rest. At the beginning of the movement condition, an arrow pointing left or right  
355 appeared on the screen with a text prompt to "start imagining left hand/right hand movement." At  
356 the beginning of the rest condition, an image of a teacup appeared with a text prompt to "rest,  
357 relax, stay calm," instructing the subject to remain relaxed during this period. Each condition  
358 lasted 14 seconds (7 TRs, yielding 7 fMRI frames), repeated for 14 cycles. The left- and right-  
359 hand conditions alternated with a rest condition in between (Extended Data Fig. 2).

### 360 Surgical Planning

361 Based on the results of the functional MRI activations, we developed a surgical implantation plan  
362 for the subject. Using the fMRI activation heatmaps combined with anatomical localization of the  
363 hand motor and sensory areas, we performed 3D modeling to select specific sites on the precentral  
364 and postcentral gyri for the right hand, where epidural cortical electrodes were placed to cover  
365 regions of significant fMRI activation (Extended Data Fig. 2). The internal device was implanted  
366 into the flat skull behind the ear, ensuring sufficient bone thickness, avoiding the temporalis muscle,  
367 and facilitating wireless charging.

368 To effectively integrate the electrode positioning from the surgical plan with the surgical navigation  
369 system, a novel engineering method was developed to address compatibility issues between the 3D  
370 model and the navigation system. The cortex was segmented using FreeSurfer, and an individualized  
371 cortical model of the patient's brain was constructed. The electrode placement on the cortical surface  
372 was designed in Blender to cover the functional areas of the precentral and postcentral gyri. To  
373 import the positioning results into the surgical navigation system, we wrote the electrode locations  
374 into the patient's original T1 DICOM data. This process involved coordinate transformation  
375 between FreeSurfer's Surface RAS reference frame and the image's original RAS reference frame  
376 (Equation 1).

$$377 \quad X' = AX \quad 1$$

378 where  $X$  represents the homogeneous coordinates of the electrode points in the Surface RAS  
379 reference frame  $(x, y, z, 1)$ ,  $X'$  represents the new coordinates in the original RAS reference frame  
380  $(x', y', z')$ , and  $A$  is the transformation matrix  $(3 \times 4)$  converting from the FreeSurfer's Surface  
381 RAS coordinate system to the DICOM image's scanner RAS coordinate system. An optimized kd-  
382 tree nearest neighbor algorithm was used to efficiently map these coordinates to the pixel points in  
383 the original DICOM images. In this setup, all pixels within a 1mm radius were marked with a value  
384 significantly higher than the maximum MRI intensity (e.g., 5000). The modified DICOM files were  
385 then imported into the navigation system, allowing the surgeon to directly determine the electrode  
386 positions during surgery. The final electrode implantation sites, as shown in Fig. 1d, matched the  
387 planned locations and the areas of optimal fMRI activation.

### 388 Impedance Measurement

389 The NEO system supports impedance measurement using milliampere (mA) stimulation current.  
390 The system uses a stimulation current of 1 mA with a pulse width of 1000  $\mu$ s at a pulse frequency

391 of 10 Hz for a duration of 5000 ms. It measures the impedance between the epidural electrode  
392 contacts. Once a month, we record impedance data to track the trend of internal environment  
393 change (Fig. 2g).

## 394 Comparison of Three Types of Brain Electrophysiology Recordings

395 To compare the differences between epidural electrocorticography (eECoG) and subdural  
396 electrocorticography (sECoG), we utilized data from the publicly available Kai Miller dataset<sup>10</sup>.  
397 Since the motor imagery patterns of paralyzed patients are more similar to actual movements in  
398 healthy individuals<sup>24</sup>, we selected real hand movement data from 10 patients whose electrodes  
399 covered the hand area. The cortical electrodes in the Kai Miller dataset had a spacing of 10 mm  
400 and a contact diameter of 2.3 mm. In our study, we used electrodes with a spacing of 8 mm and a  
401 contact diameter of 3.2 mm, which are comparable in size. The EEG electrode spacing in the  
402 patients' EEG caps was approximately 4 cm. To ensure consistent results, all three types of brain  
403 electrical activity were processed using the common average rereference method. Additionally, to  
404 study the spatial resolution differences between different brain recordings, we introduced motor  
405 imagery data from the BCI2000 dataset for comparison<sup>11</sup>.

406 In terms of frequency, we calculated the Event-Related Spectral Perturbation (ERSP) for eECoG,  
407 sECoG, and EEG during the 0-2.5 seconds of movement relative to the 0-2.5 seconds of resting  
408 state (Equation 2). This allowed us to compare the modulation depths of different frequency bands  
409 across the different brain electrical activities.

$$410 \quad ERSP = \frac{P_{task} - P_{rest}}{P_{rest}} \quad 2$$

411 Where  $P_{task}$  refers to the power of the brain electrical activity in the frequency band during  
412 movement, and  $P_{rest}$  refers to the power in the resting state. Power spectral density (PSD) was  
413 calculated using resting state data to compare the spectral energy differences of the different brain  
414 electrical activities (Fig. 2b).

415 To qualitatively compare the spatial resolution differences, we calculated the relationship between  
416 the distance between electrode pairs and the correlation coefficient of the electrode signals (Fig.  
417 2c). To maintain consistency with the number of subjects and tasks selected in the eECoG dataset,  
418 we selected all electrode pairs from the first 10 subjects in the BCI2000 dataset for real left- and  
419 right-hand movements. All eECoG signals were filtered with a 1 Hz high-pass filter, using the  
420 original reference electrodes (EEGs were referenced to mastoids, sECoGs and eECoGs were  
421 referenced to the scalp).

## 422 Spatio-Spectral Riemannian Geometry Decoding Method

423 The spatio-spectral information in eECoG signals can be described using a covariance matrix.  
424 Typical eECoG responses to motor imagery include ERSP across different frequency bands. By  
425 constructing a multi-band joint covariance matrix (Equation 3), we can effectively extract the  
426 spatio-spectral patterns of the EEG:

$$427 \quad C_f = \begin{pmatrix} Z_{f_1} Z_{f_1}^T & \dots & Z_{f_1} Z_{f_F}^T \\ \vdots & \ddots & \vdots \\ Z_{f_F} Z_{f_1}^T & \dots & Z_{f_F} Z_{f_F}^T \end{pmatrix} \quad 3$$

428 where  $Z_{f_i}, i = 1, \dots, F$  represents the channel signals filtered by different frequency bands, and  $F$   
429 is the number of selected frequency bands.

430 The Affine Invariant Riemannian Metric (AIRM, Equation 4) can measure the distance between  
431 covariance matrices:

$$432 \quad \delta_r(C_1, C_2) = \left\| C_1^{-\frac{1}{2}} C_2 C_1^{-\frac{1}{2}} \right\|_F = \left( \sum_{i=1}^n \log^2 \lambda_i \right)^{\frac{1}{2}} \quad 4$$

433 where  $\|\cdot\|_F$  represents the Frobenius norm, and  $\lambda_i$  are the eigenvalues of the matrix  
434  $C_1^{-1/2} C_2 C_1^{-1/2}$ .

435 The AIRM metric has the following property: for any two samples from the source space that  
436 form covariance matrices  $S_A$  and  $S_B$ , mapping through a propagation matrix  $L$  (where  $L$  is  
437 invertible) results in sensor space covariance matrices  $X_A = L S_A L^T$ ,  $X_B = L S_B L^T$ . It can be  
438 proven that:

$$439 \quad \delta_r(X_A, X_B) = \delta_r(S_A, S_B)$$

440 This indicates that the separability in the source space and the sensor space is identical. Similarly,  
441 over long-term use, physiological changes may alter the propagation matrix  $L'$ , but the AIRM  
442 distance measure ensures that separability remains unchanged. In contrast, BCI decoding  
443 algorithms using spatial filters may fail due to changes in the propagation matrix, causing spatial  
444 filter templates to become ineffective. Therefore, BCI decoding algorithms using the AIRM  
445 metric possess robustness in the sensor space and long-term stability.

446 To select the most effective frequency bands for decoding, we evaluated the separability of  
447 different frequency bands for resting and right-hand motor imagery states using a Riemannian-  
448 based class distinctiveness method.

449 Linear Discriminant Analysis (LDA) can be extended to construct class distinctiveness metrics  
450 under the Riemannian metric (Equation 5)<sup>25</sup>:

$$451 \quad D(A, B) = \frac{\delta_r(\overline{C^A}, \overline{C^B})}{\frac{1}{2}(\sigma_{C^A} + \sigma_{C^B})} \quad 5$$

452 where  $\bar{C}$  represents the mean covariance under the Riemannian metric, and  $\sigma_C$  represents the  
453 standard deviation of the covariance under the Riemannian metric,  $\sigma_C = \frac{1}{n-1} \sum_{i=1}^n \delta_r(C_i, \bar{C})$ . The  
454 superscripts  $C^{(A/B)}$  indicate the corresponding classes.

455 Subsequently, a classifier based on AIRM can be constructed by embedding the data into the  
456 tangent space<sup>26</sup>. For the manifold  $M$  constituted by the aforementioned eECoG feature  
457 covariance matrices, the Fréchet mean point  $X_{ref}$  of the manifold can be found (Equation 6):

$$458 \quad X_{ref} = \operatorname{argmin}_{X_{ref}} \sum_{i=1}^N \delta^2(X_i, X_{ref}) \quad 6$$

459 Based on this point, the tangent space  $T_{X_{ref}}M$  can be constructed, and the data points  $X_i$  can be  
460 embedded into this space to obtain the projected points  $S_i$  (Equation 7), where  $\log_m$  denotes the  
461 matrix logarithm operation.

$$462 \quad S_i = \log_{X_{ref}}(X_i) = X_{ref}^{-\frac{1}{2}} \log_m \left( X_{ref}^{-\frac{1}{2}} X_i X_{ref}^{-\frac{1}{2}} \right) X_{ref}^{-\frac{1}{2}} \quad 7$$

463 In our study, the epidural intracranial EEG of patients exhibits a typical Event Related  
464 Synchronization (ERS) effect at high frequencies (e.g., 55-95Hz) and a typical Event Related  
465 Desynchronization (ERD) effect at low frequencies (15-30Hz and 35-50Hz). Therefore, we  
466 designed a dual-frequency integrated spatio-spectral Riemannian geometry algorithm. Due to the  
467 physiological differences between low-frequency and high-frequency oscillatory activities, low-  
468 frequency activities were filtered at 15-30Hz and 35-50Hz, while high-frequency activities were  
469 band-pass filtered at 55-95Hz and then enveloped (Extended Data Fig. 3). Subsequently, a large  
470 covariance matrix of the feature signals was constructed, which was whitened to retain 99% of the  
471 variance dimension components to reduce the dimensionality. The samples were then embedded  
472 into the tangent space constituted by the Fréchet mean point, and finally sent to a logistic  
473 regression classifier to build the decoder for BCI calibration.

## 474 Control Decoding Methods

475 We employed two classical BCI decoding methods to evaluate our model. **Linear Model:** To  
476 evaluate the decoding method proposed in this paper, we selected a commonly used linear model  
477 as a baseline for comparison<sup>1,27</sup>. This linear model first uses a band-pass filter in the 0-150Hz  
478 frequency range to filter the signal into nine different frequency bands and then downsamples to  
479 10Hz. The signals from the nine frequency bands and different channels are then concatenated  
480 into a 315-dimensional feature vector (7 channels \* 9 frequency bands \* 5 time points). Finally,  
481 this feature vector is used for decoding with a logistic regression classifier. We also used 10-fold  
482 cross-validation to optimize the regularization parameter of the logistic regression classifier to  
483 prevent overfitting. **Common Spatial Pattern (CSP) Model:** Additionally, since there is a close  
484 relationship between Riemannian methods and spatial filtering methods, we designed a model  
485 using CSP spatial filters to compare with the Riemannian method's results<sup>13,28</sup>. This model

486 constructs the covariance matrix using the same frequency bands as the Riemannian method. The  
487 CSP method is then used to calculate and retain 16 spatial filters. The energy features of the  
488 resulting 16-dimensional spatial patterns are used for decoding with a logistic regression classifier.  
489 For each model, 10-fold cross-validation is used to optimize the regularization parameter of the  
490 logistic regression classifier to prevent overfitting.

## 491 Decoding Continuous Grasping States using Hidden Markov Model

492 Considering that the natural grasping process is inherently continuous, with each state at a given  
493 time point being dependent on the preceding and following states, leveraging this dependency can  
494 significantly enhance the reliability of maintaining a grasp. The Hidden Markov Model (HMM),  
495 by constructing a multi-order stochastic process, links the probability of the current hidden state  
496 with the observed data and the probability of the hidden state at the previous time point. This can  
497 be used to describe the natural grasping process. We define the hidden states as either resting or  
498 grasping. In our constructed HMM algorithm, the emission probability  $p(z_t|s_k)$  is derived from  
499 the Riemannian geometric classification model obtained through supervised training, while the  
500 transition probability matrix is semi-supervised, estimated using the forward-backward algorithm  
501 based on data from the patient's free-grasping training sessions. The first-order Hidden Markov  
502 Model can predict the probability of each hidden state at the current step based on the probability  
503 of each hidden state at the previous step (Equation 8):

$$504 \quad p(s_{k,t}) = p(z_t|s_k) \sum_i p(s_{k,t}|s_{i,t-1})p(s_{i,t-1}) \quad 8$$

505 where  $z_t$  is the observed data at time  $t$ , and  $s_k$  is state  $k$ . We set a threshold  $p_{th}$ , and when the  
506 likelihood probability of the patient's new state exceeds this threshold, the model switches states.  
507 This threshold is estimated based on offline validation results and is set to 0.8 for the patient.

508 Additionally, we apply an extra step of first-order filtering to smooth the probabilities output by  
509 the HMM (Equation 9). The parameter  $\eta$  is adjusted based on offline validation results and is set  
510 to 0.7 for the patient.

$$511 \quad \hat{p}_{curr} = \eta p_{last} + (1 - \eta)p_{curr} \quad 9$$

512 where  $p_{last}$  is the hidden state probability from the previous step,  $p_{curr}$  is the current hidden  
513 state probability inferred from Equation 6, and  $\hat{p}_{curr}$  is the final estimated hidden state  
514 probability.

## 515 Brain-Computer Interface Training Paradigms

516 The calibration task is utilized for personalized model calibration and BCI testing. The paradigm  
517 consists of 15 trials per session, with each trial including 5 seconds of movement, feedback (10  
518 seconds for success, 2 seconds for failure), and 5 seconds of resting state. The experiment begins  
519 with a 10-second period during which a crosshair appears at the center of the screen, and the  
520 participant needs to focus on the crosshair and remain calm. After 10 seconds, the actual task

521 begins. At the start of the motor imagery task, a one second blank screen is firstly given to remind  
522 the participant to prepare. After that, an arrow pointing left or right appears at the center of the  
523 screen, indicating left-hand or right-hand movement respectively, accompanied by a text prompt  
524 "Start imagining left-hand/right-hand movement." Feedback is provided after the motor phase,  
525 with the model making a judgment every second during the 5-second motor phase. The task has  
526 three difficulty levels: easy, medium, and hard, requiring correct judgments of 3, 4, and 5 times  
527 respectively. Only with correct judgments will the participant receive pneumatic hand feedback  
528 and a "Congratulations" message on the screen; otherwise, the message "Keep trying" will be  
529 displayed (Extended Data Fig. 5a). Before fixing the model, random feedback with an 85%  
530 accuracy rate is given. In the first session of the calibration paradigm, fake feedback is used. In the  
531 second calibration session, feedback results are calculated using the model calibrated with the first  
532 session of training data. After the second calibration session, the final model is trained using data  
533 from both sessions and fixed for the patient. We perform this calibration task monthly to  
534 periodically assess the model's performance.

535 During rehabilitation training, the patient uses the fixed model for free grasping tasks. The model  
536 makes a judgment every 0.1 seconds to determine the patient's grasping or relaxation state. To  
537 avoid false triggers caused by the EEG offset response after the patient's releasing an object, there  
538 is a 3-second freeze period during which no new judgments are made. The model displays the  
539 confidence level of the grasp in the form of a progress bar on the screen, providing visual  
540 feedback to the participant. To quantitatively evaluate the effectiveness of the BCI system, we  
541 designed a **nine-square grid paradigm** requiring the patient to take objects to designated targets  
542 using the BCI. A 50.4 cm wide and 35.6 cm long nine-square grid board, as well as standard  
543 components of height 15 cm, upper cylinder diameter 4.5/6/6.5 cm, and lower disc diameter 10 cm  
544 were used in this paradigm (Extended Data Fig. 5b). The patient is instructed by the experimenter  
545 to use the BCI to drive the pneumatic hand to grasp the standard component from the center of the  
546 nine-square grid and move it to the designated color block position, then release the object by  
547 controlling the pneumatic hand. The test is repeated in two rounds, and the total time from the  
548 start of the instruction to the successful placement of the object is recorded to evaluate whether the  
549 patient can smoothly control the state switching of the BCI system. We also compared the  
550 patient's success rate with and without BCI assistance. Success is defined as completing the task  
551 within 10 seconds without touching the grid boundaries before picking up the object and without  
552 dropping it midway. Any other result is considered a failure.

## 553 **Model Training and Evaluation**

554 The model is trained based on two sets of calibration data. Since High Gamma (HG) activity  
555 decays over time during imagined grasping, we use data from the first 1.5 seconds after the onset  
556 of motor imagery and the entire 5 seconds of resting state as the training data. The data are  
557 segmented at 0.5-second intervals for model fitting. One set of data is used for model training,  
558 utilizing 10-fold cross-validation to select the optimal regularization parameters for the classifier.  
559 After fitting the classification model, we fit the HMM state transition matrix using the patient's  
560 grasping behavior data to construct a complete decoding model. Validation is conducted using a  
561 different set of data, evaluating both segment metrics and event metrics. After validation, a final  
562 model is trained using both sets of calibration data.

563 During model calibration, it is necessary to design evaluation criteria to assess the effectiveness of  
564 the model. Since the goal is to decode natural grasping states, which is a continuous time process,  
565 evaluation needs to consider both segment metrics (such as sample classification accuracy) and  
566 event metrics (sensitivity and specificity of event detection). **Segment Metrics:** The model  
567 directly classifies data segments and calculates classification accuracy. Additionally, due to the  
568 uneven distribution of classes in the segmented data samples, the F1 score (the harmonic mean of  
569 precision and recall) is used, which is insensitive to class imbalance. For segment metrics, the  
570 random level for the F1 score and AUC is 0.5. **Event Metrics:** To evaluate grasping accuracy  
571 over continuous time, we designed event-based metrics. If a grasping event is correctly identified  
572 within 0.5s before its onset and 2 seconds after it, it is considered a correct judgment; otherwise, it  
573 is a false negative. If more than one grasping event is detected during a single grasping event, it is  
574 considered a false positive. Precision, recall, and their harmonic mean (F1 score) are calculated  
575 accordingly. Due to the low frequency of grasping events, the random level for event metrics is  
576 low. Monte Carlo simulations estimate the random level for the F1 score of event metrics to be  
577 approximately 0.09 (with the grasping onset time covered about 10% of total time), indicating that  
578 continuous grasping tasks are relatively difficult, much harder than simple binary classification  
579 tasks.

## 580 Functional Rehabilitation Assessment Methods

581 This study uses the ISNCSCI scale and the ARAT scale to assess patients' neurological and upper  
582 limb functional status, respectively. The ISNCSCI scale is evaluated by two attending physicians,  
583 and any discrepancies in their evaluations are discussed to reach a single result. The ISNCSCI  
584 scale is measured monthly starting from the 2<sup>nd</sup> to 9<sup>th</sup> month post-surgery. The ARAT scale  
585 assessments are conducted by rehabilitation physicians and experimenters, with the process being  
586 video recorded.

587 The testing of somatosensory evoked potentials (SEP) follows the standards of the International  
588 Federation of Clinical Neurophysiology (IFCN)<sup>29</sup>. The stimulation sites are at the wrist  
589 corresponding to the median, radial and ulnar nerves respectively. A 6×9 cm silver/silver chloride  
590 adhesive electrode is used. The positive electrode is placed distally on the trunk, the negative  
591 electrode proximally, with a 2 cm distance between them. The stimulation is a unidirectional  
592 pulse, with 2 Hz frequency 400 μs pulse width and amplitudes of 16 mA for the median and radial  
593 nerves, or 12 mA for the ulnar nerve. This setup aims to stably evoke SEP while avoiding pain.  
594 The stimulation is repeated 160 times in each session. During stimulation, SEPs are recorded with  
595 epidural electrodes at a sampling rate of 1000 Hz. The signals are band-pass filtered (20-400 Hz)  
596 and averaged across trials to obtain the SEP waveform. Monthly recordings are repeated at the  
597 same stimulation site and parameters to observe changes in the SEP waveform.

598 In SEP analysis, for early (15-35 ms) and late (40-80 ms) SEP components, the average waveform  
599 amplitude is extracted. To minimize amplitude increases due to enhanced random phase  
600 oscillatory activity, the Bootstrap method is used. For each Bootstrap sample set, the average SEP  
601 response is extracted, and the average waveform amplitudes of early and late components are  
602 extracted. For the data from 1<sup>st</sup> and 9<sup>th</sup> month after implantation, permutation test is used to



603 calculate the p-values that 9<sup>th</sup> month's amplitude is greater than that of 1<sup>st</sup> month, and the FDR  
604 correction is applied to control the false discovery rate in multiple comparisons.

## 605 Hand Trajectory Recognition in the Free Grasping paradigms

606 To accurately capture hand movement trajectories during the free grasping process, a USB  
607 webcam was positioned directly above the experimental table to record the hand movements from  
608 a top-down perspective (Extended Data Fig. 9). A serial port synchronization signal and LED light  
609 were used to synchronize the video recording with the EEG data. For the video data of both  
610 pneumatic hand grasping and bare hand grasping, we finetuned a hand keypoint detection model  
611 to analyze the hand movement trajectories. The main structure of the model utilizes a high-  
612 resolution convolutional network (HRNet)<sup>30</sup> pre-trained on the OneHand10k dataset. The  
613 detection algorithm employs distribution-aware coordinate representation (DARK)<sup>31</sup> based on  
614 heatmaps to detect four key points of the pneumatic hand or the hand: the index fingertip, thumb  
615 tip, the base of the thumb (thenar), and the wrist. For the patient's grasping data, the coordinates of  
616 the thenar key point were extracted as the hand movement trajectory. The start time of each trial  
617 was defined as the moment the hand contacted the central cylindrical object, and the end time was  
618 defined as the moment of grasping failure or successfully reaching the target position and  
619 releasing the object. The model was fine-tuned based on the OneHand10K pre-trained model. The  
620 pneumatic hand model training data included 1,295 annotated images with a resolution of  
621 960x540, with 80% of the data used for training and 20% for testing. The keypoint recognition  
622 model achieved an AUC of 0.89. The bare hand detection model training data included 1,118  
623 annotated images with a resolution of 960x540, with 80% of the data used for training and 20%  
624 for testing. The model achieved an AUC of 0.85.

## 625 Acknowledgement

626 We thank our volunteer and his family for their commitment and trust. We thank Sichang Chen and  
627 Lin Liu from Xuanwu Hospital of Capital Medical University, Yujing Wang and Xiaoshan Huang  
628 from Neuracle Technology Co., Zheng Yan from Huaqiao University, Ze'ao Xiong, Ruwei Yao,  
629 Yunjing Li, Le Yu, Yichao Li from Tsinghua University, and Zhouxingyu Yan from John Hopkins  
630 University for their help in this work.

## 631 Reference

- 632 1. Benabid, A. L. *et al.* An exoskeleton controlled by an epidural wireless brain-machine  
633 interface in a tetraplegic patient: a proof-of-concept demonstration. *Lancet Neurol.* **18**, 1112–  
634 1122 (2019).
- 635 2. Moses, D. A. *et al.* Neuroprosthesis for Decoding Speech in a Paralyzed Person with Anarthria.  
636 *N. Engl. J. Med.* **385**, 217–227 (2021).
- 637 3. Lorach, H. *et al.* Walking naturally after spinal cord injury using a brain–spine interface.  
638 *Nature* **618**, 126–133 (2023).
- 639 4. Samejima, S. *et al.* Brain-computer-spinal interface restores upper limb function after spinal  
640 cord injury. *IEEE Trans. Neural Syst. Rehabil. Eng.* **29**, 1233–1242 (2021).
- 641 5. Patel, P. R. *et al.* Utah array characterization and histological analysis of a multi-year implant

- 642 in non-human primate motor and sensory cortices. *J. Neural Eng.* **20**, (2023).
- 643 6. Branco, M. P., Geukes, S. H., Aarnoutse, E. J., Ramsey, N. F. & Vansteensel, M. J. Nine  
644 decades of electrocorticography: A comparison between epidural and subdural recordings. *Eur.*  
645 *J. Neurosci.* **57**, 1260–1288 (2023).
- 646 7. Anderson, M. A. *et al.* Natural and targeted circuit reorganization after spinal cord injury. *Nat.*  
647 *Neurosci.* **25**, 1584–1596 (2022).
- 648 8. Zeng, F.-G., Rebscher, S., Harrison, W., Sun, X. & Feng, H. Cochlear Implants: System  
649 Design, Integration, and Evaluation. *IEEE Rev. Biomed. Eng.* **1**, 115–142 (2008).
- 650 9. Formento, E. *et al.* Electrical spinal cord stimulation must preserve proprioception to enable  
651 locomotion in humans with spinal cord injury. *Nat. Neurosci.* **21**, 1728–1741 (2018).
- 652 10. Miller, K. J. A library of human electrocorticographic data and analyses. *Nat. Hum. Behav.* **3**,  
653 1225–1235 (2019).
- 654 11. Schalk, G., McFarland, D. J., Hinterberger, T., Birbaumer, N. & Wolpaw, J. R. BCI2000: A  
655 General-Purpose Brain-Computer Interface (BCI) System. *IEEE Trans. Biomed. Eng.* **51**,  
656 1034–1043 (2004).
- 657 12. Congedo, M., Barachant, A. & Bhatia, R. Riemannian geometry for EEG-based brain-  
658 computer interfaces; a primer and a review. *Brain-Computer Interfaces* **4**, 155–174 (2017).
- 659 13. Koles, Z. J. The quantitative extraction and topographic mapping of the abnormal components  
660 in the clinical EEG. *Electroencephalogr. Clin. Neurophysiol.* **79**, 440–447 (1991).
- 661 14. Inanici, F., Brighton, L. N., Samejima, S., Hofstetter, C. P. & Moritz, C. T. Transcutaneous  
662 Spinal Cord Stimulation Restores Hand and Arm Function after Spinal Cord Injury. *IEEE*  
663 *Trans. Neural Syst. Rehabil. Eng.* **29**, 310–319 (2021).
- 664 15. Moritz, C. *et al.* Non-invasive spinal cord electrical stimulation for arm and hand function in  
665 chronic tetraplegia : a safety and efficacy trial. *Nat. Med.* **30**, 18–24 (2024).
- 666 16. Kramer, J. K., Taylor, P., Steeves, J. D. & Curt, A. Dermatomal somatosensory evoked  
667 potentials and electrical perception thresholds during recovery from cervical spinal cord injury.  
668 *Neurorehabil. Neural Repair* **24**, 309–317 (2010).
- 669 17. Kramer, J. L. K., Moss, A. J., Taylor, P. & Curt, A. Assessment of posterior spinal cord  
670 function with electrical perception threshold in spinal cord injury. *J. Neurotrauma* **25**, 1019–  
671 1026 (2008).
- 672 18. Yozbatiran, N., Der-Yeghiaian, L. & Cramer, S. C. A standardized approach to performing the  
673 action research arm test. *Neurorehabil. Neural Repair* **22**, 78–90 (2008).
- 674 19. Luo, S. *et al.* Stable Decoding from a Speech BCI Enables Control for an Individual with ALS  
675 without Recalibration for 3 Months. *Adv. Sci.* **10**, 1–12 (2023).
- 676 20. Milekovic, T. *et al.* Stable long-term BCI-enabled communication in ALS and locked-in  
677 syndrome using LFP signals. *J. Neurophysiol.* **120**, 343–360 (2018).
- 678 21. Fountas, K. N. & Smith, J. R. Subdural electrode-associated complications: A 20-year  
679 experience. *Stereotact. Funct. Neurosurg.* **85**, 264–272 (2007).
- 680 22. Donati, A. R. C. *et al.* Long-Term Training with a Brain-Machine Interface-Based Gait  
681 Protocol Induces Partial Neurological Recovery in Paraplegic Patients. *Sci. Rep.* **6**, 1–16  
682 (2016).
- 683 23. Jovanovic, L. I. *et al.* Restoration of Upper Limb Function after Chronic Severe Hemiplegia: A  
684 Case Report on the Feasibility of a Brain-Computer Interface-Triggered Functional Electrical  
685 Stimulation Therapy. *Am. J. Phys. Med. Rehabil.* **99**, e35–e40 (2020).

- 686 24. Lotze, M. & Halsband, U. Motor imagery. *J. Physiol. Paris* **99**, 386–395 (2006).
- 687 25. Yamamoto, M. S., Lotte, F., Yger, F. & Chevallier, S. Class-distinctiveness-based frequency  
688 band selection on the Riemannian manifold for oscillatory activity-based BCIs: preliminary  
689 results. in *2022 44th Annual International Conference of the IEEE Engineering in Medicine &*  
690 *Biology Society (EMBC) vols 2022-July* 3690–3693 (IEEE, 2022).
- 691 26. Barachant, A., Bonnet, S., Congedo, M. & Jutten, C. Classification of covariance matrices  
692 using a Riemannian-based kernel for BCI applications. *Neurocomputing* **112**, 172–178 (2013).
- 693 27. Moly, A. *et al.* An adaptive closed-loop ECoG decoder for long-term and stable bimanual  
694 control of an exoskeleton by a tetraplegic. *J. Neural Eng.* **19**, (2022).
- 695 28. Lemm, S., Blankertz, B., Curio, G. & Müller, K. R. Spatio-spectral filters for improving the  
696 classification of single trial EEG. *IEEE Trans. Biomed. Eng.* **52**, 1541–1548 (2005).
- 697 29. Cruccu, G. *et al.* Recommendations for the clinical use of somatosensory-evoked potentials.  
698 *Clin. Neurophysiol.* **119**, 1705–1719 (2008).
- 699 30. Wang, J. *et al.* Deep High-Resolution Representation Learning for Visual Recognition. *IEEE*  
700 *Trans. Pattern Anal. Mach. Intell.* **43**, 3349–3364 (2021).
- 701 31. Zhang, F., Zhu, X., Dai, H., Ye, M. & Zhu, C. Distribution-Aware Coordinate Representation  
702 for Human Pose Estimation. *Proc. IEEE Comput. Soc. Conf. Comput. Vis. Pattern Recognit.*  
703 7091–7100 (2020) doi:10.1109/CVPR42600.2020.00712.
- 704
- 705

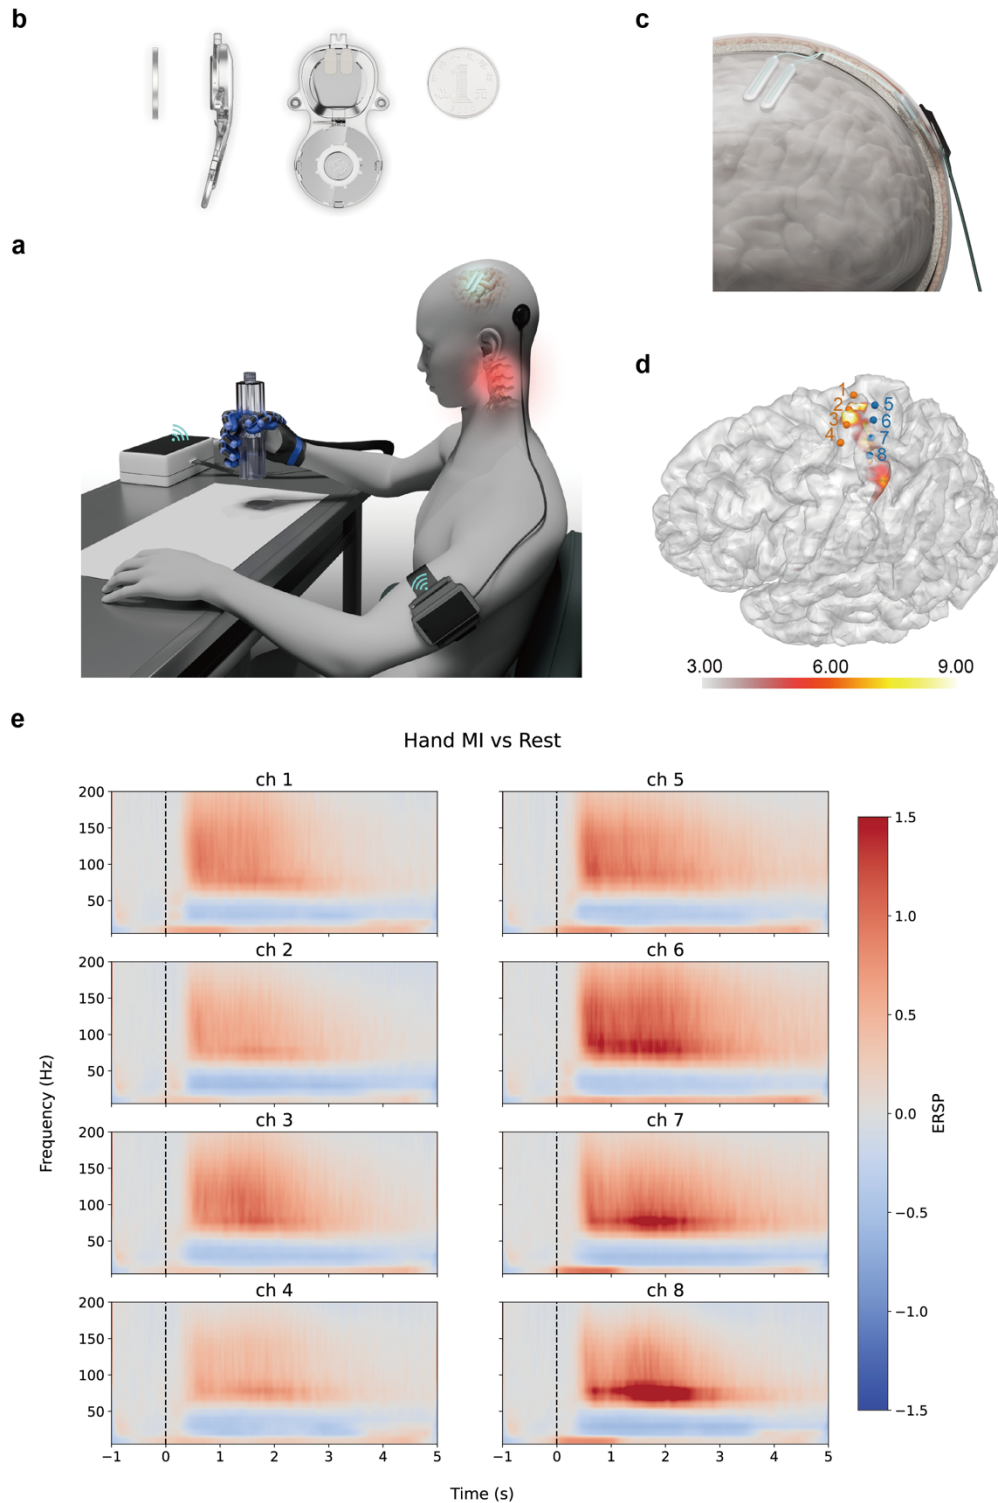

706

707 **Figure 1 NEO system design and basic signal characteristics.** a, Diagram of the NEO brain-computer  
708 interface (BCI) system. The NEO BCI system transmits epidural ECoG through a coil to an external  
709 device fixed on the patient's shoulder. The external device sends the signals to the host computer, where  
710 an algorithm decodes the patient's grasping intention and drives a pneumatic glove to grasp objects.  
711 When the patient stops imagining the grasp, the pneumatic glove is driven to open and release the object.  
712 b, Structure of the NEO implant. The upper part is the implant, and the lower part is the coil. c, Diagram  
713 of the NEO implant implantation position. The coil is magnetically attached through the skin,

714 transmitting signals and power. Electrodes are fixed on the surface of the dura mater and connected to  
 715 the implant through a skull tunnel. d, Diagram of the patient implantation position. The orange and blue  
 716 dots represent the electrodes on the precentral and postcentral gyrus, respectively. The heat map  
 717 overlaying the cortex represents functional MRI activation significance values (negative logarithm of p  
 718 values). e, Event-related spectral perturbation (ERSP) during imagined grasping. The spectral pattern  
 719 exhibits a typical dual-frequency characteristic, including low-frequency (15-50 Hz) ERD and high-  
 720 frequency (>50 Hz) ERS. Hand-MI: Hand Motor Imagery.

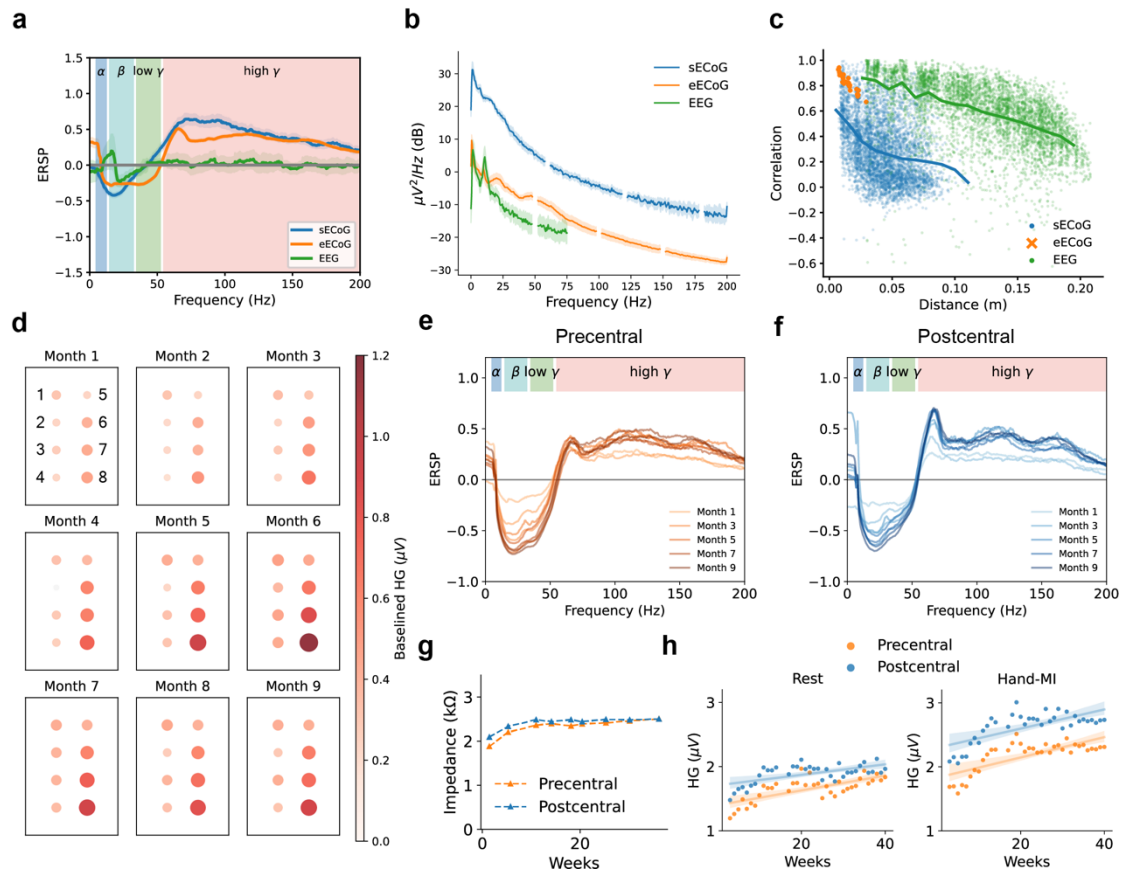

721  
 722 **Figure 2 Long-term spatio-temporal-spectral characteristics of epidural signals.** a, Comparison of  
 723 event-related spectral perturbations (ERSP) among subdural ECoG, epidural ECoG, and scalp EEG.  
 724 Epidural ECoG exhibits an effective frequency band range similar to subdural ECoG. b, Comparison of  
 725 PSD among the three types of electrophysiological recordings. Subdural ECoG has the highest amplitude,  
 726 and epidural ECoG has a higher amplitude in the higher frequency band (30-70 Hz) compared to scalp  
 727 EEG. The PSD excludes the frequency band of power line interference. c, Relationship between channel  
 728 signal correlation and electrode distance. d, Trend of high-frequency energy (55-95 Hz) spatial patterns  
 729 of epidural ECoG during imagined hand movements. Long-term training significantly enhances high-  
 730 frequency activity in the ECoGs of all channels during motor imagery (Month 1 vs. Month 6,  $p < 0.001$ ).  
 731 Channels where the HG response is not significantly greater than zero are marked as gray. e-f, Trend of  
 732 the average ERSP of precentral and postcentral electrodes, with each curve representing the average  
 733 ERSP of one month's hand motor imagery data. Both low-frequency ERD and high-frequency ERS  
 734 gradually increase with training. g, Impedance changes of precentral and postcentral electrodes. h, Trend  
 735 in high-frequency energy (55-95 Hz, un-baselined) of precentral and postcentral electrodes during rest  
 736 and hand motor imagery, both showing significant positive correlations ( $p < 0.001$ ). In a, b, and c, subdural  
 737 ECoG data are from the Kai Miller dataset<sup>10</sup>; a and b use scalp EEG from the patient's own recordings;

738 c uses scalp EEG from the BCI2000 dataset<sup>11</sup>. Hand-MI: Hand Motor Imagery. HG: High-Gamma band  
739 power.  
740

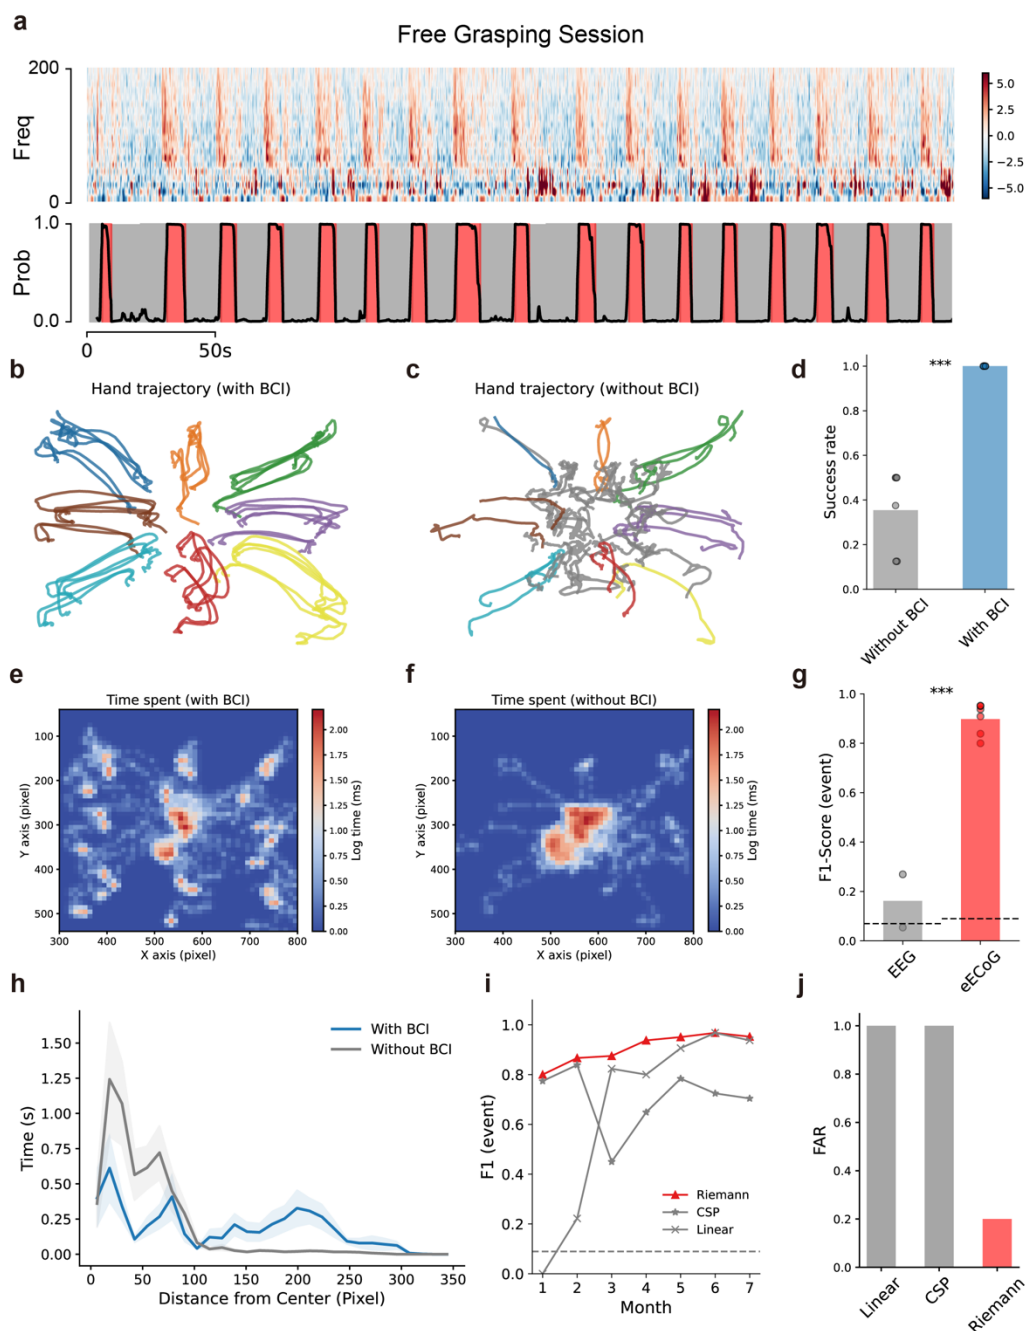

741

742 **Figure 3 Minimally invasive epidural brain-computer interface (BCI) for motor assistance.** a,  
743 Example of BCI testing data and decoded confidences. The red shading indicates the time range of the  
744 grasping action as determined by the decoder. The grasping action has a high single-trial signal-to-noise  
745 ratio. b-c, Hand movement trajectories of the patient performing the BCI testing task with BCI assistance  
746 (b) or unaided (c), recorded by a top-down camera and identified by a keypoint detection model. d, With  
747 BCI assistance, the patient's success rate of moving the object to the designated position within 10  
748 seconds is 100%, whereas, without BCI assistance, the success rate is only 35%. e-f, Logarithmic spatial  
749 distribution of the time spent with BCI assistance (e) or unaided (f). With BCI assistance, the time spent

750 is clustered in the target start and end points, while unaided, the time was mostly spent in the start area.  
751 g, Comparison of F1 scores for detecting grasping events using epidural ECoG and scalp EEG. The black  
752 dashed line represents the chance level. Epidural ECoG detection F1 scores are significantly higher than  
753 those of scalp EEG. h, Distribution of the relationship between time spent and distance to the central start  
754 point. With BCI assistance, the patient can pick up the object and move to the edge more quickly. i,  
755 Changes in the F1 score of the decoding algorithm for detecting grasping events over 7 months. The  
756 Riemannian geometry-based decoding method shows long-term stability, outperforming the control  
757 linear method and CSP method. The gray dashed line represents the chance level. j, Robustness of  
758 different models to electromyographic (EMG) noise generated by chewing during daily use. Due to its  
759 high specificity to spatial patterns, the Riemannian geometry method shows greater robustness to EMG  
760 noise from chewing, which has a different spatial pattern from grasping, compared to the linear method  
761 and the CSP method. FAR: False Activation Rate.  
762  
763

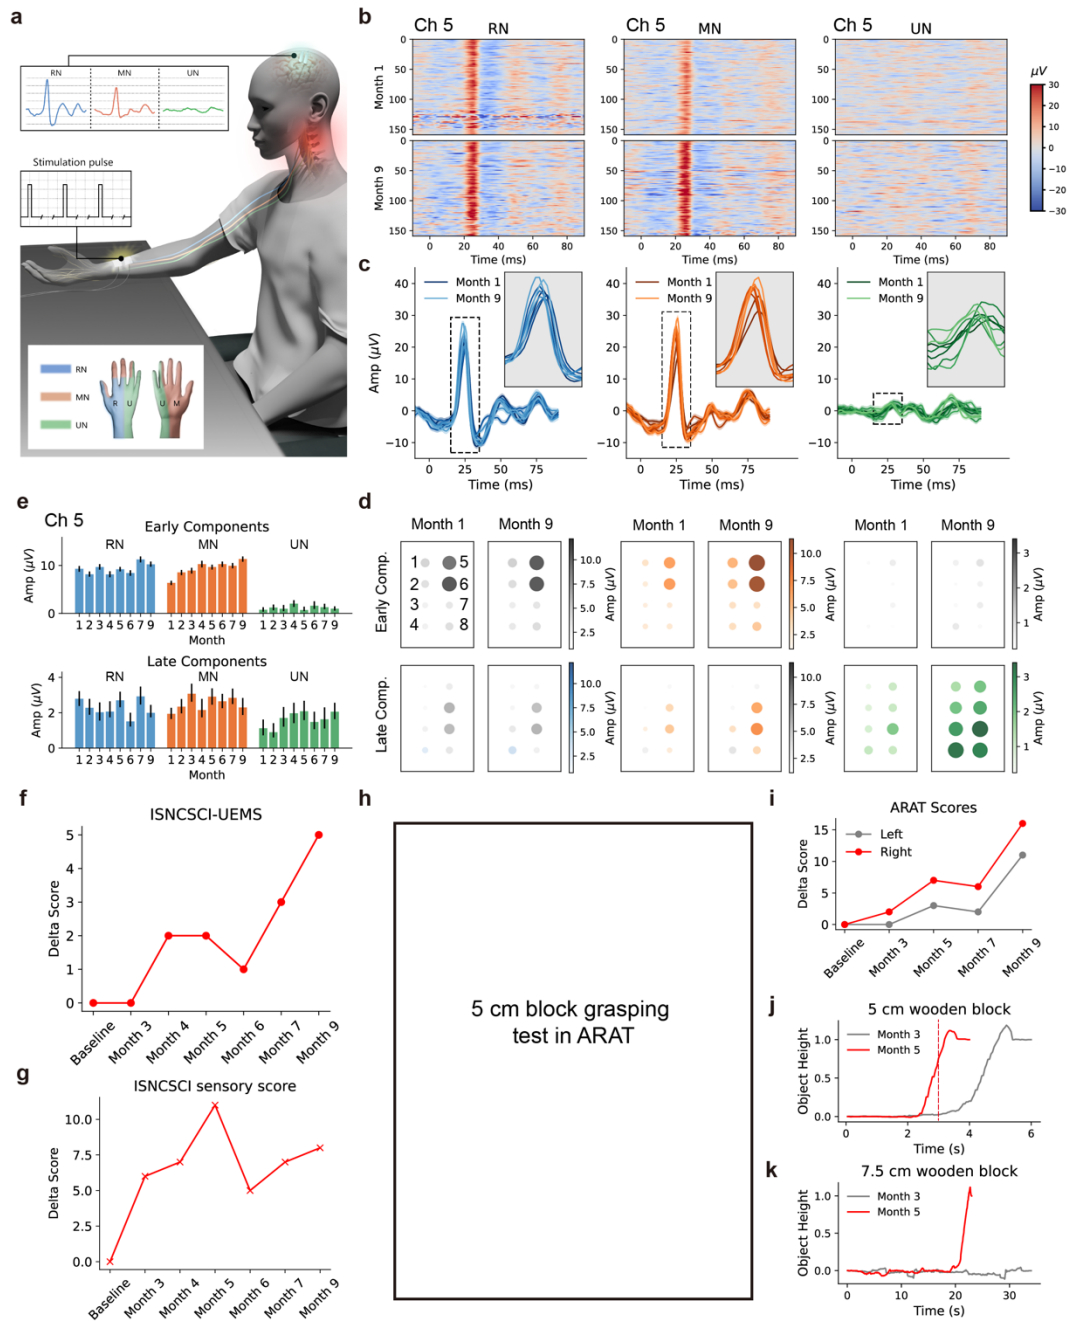

764

765 **Figure 4 Electrophysiological and functional rehabilitation assessments.** a, Diagram of sensory evoked  
 766 potential (SEP) measurement. Functional stimulators were used to stimulate the patient's radial, median,  
 767 and ulnar nerves, and SEP activities were recorded from NEO epidural electrodes. b, Trial images of SEP  
 768 waveforms (channel 5) for the patient's radial nerve (left), median nerve (center), and ulnar nerve (right)  
 769 at the 1<sup>st</sup> and 9<sup>th</sup> months. c, SEP waveforms over 9 months, with colors from dark to light representing  
 770 SEP waveforms over the 9 months (channel 5). d, Changes in average amplitude of early SEP  
 771 components (15-35 ms) and late SEP components (40-80 ms) at different electrodes from the 1st month  
 772 to the 9<sup>th</sup> month. Electrodes with no significant enhancement ( $p > 0.05$ , FDR-corrected) were marked in  
 773 gray. e, Relationship of average amplitude changes over time for early SEP components (15-35 ms, top)  
 774 and late SEP components (40-80 ms, bottom) of channel 5. f, Changes in key muscle strength in the  
 775 upper limbs according to the ISNCSCI scale. g, Changes in sensory scores of the ISNCSCI scale. Sensory



776 scores encountered a considerable decrease in the 6<sup>th</sup> month due to the patient's use of antispasmodic  
 777 medication. h, The patient grasping and releasing a 5 cm block in the Action Research Arm Test (ARAT)  
 778 test at the 3rd and 5th months. The red curve represents the block trajectory, the boxes mark the start and  
 779 end points, and the dashed lines indicate the height of the lift. i, Changes in ARAT scores over the course  
 780 of training, with the right hand showing greater improvement than the left hand. j-k, Changes in lift  
 781 height of 5 cm and 7.5 cm blocks over time during grasp and release tasks in the ARAT test at the 3rd  
 782 and 5th months, with the red dashed line indicating the time point shown in h. Trajectories were obtained  
 783 from video recordings and manually annotated. MN: median nerve; RN: radial nerve; UN: ulnar nerve.  
 784  
 785

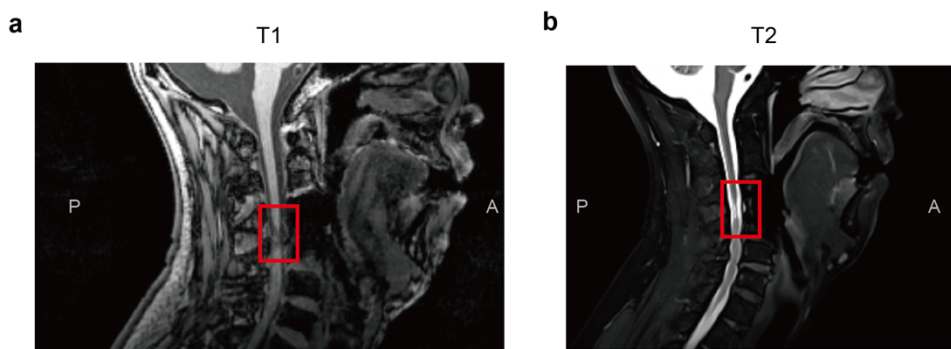

786  
 787 Extended Data Figure 1 MRI Scans of the Patient's Head and Neck (A) Cervical spine T1 structural  
 788 image (B) Cervical spine T2 structural image; the red box indicates the location of the patient's spinal  
 789 cord injury.  
 790

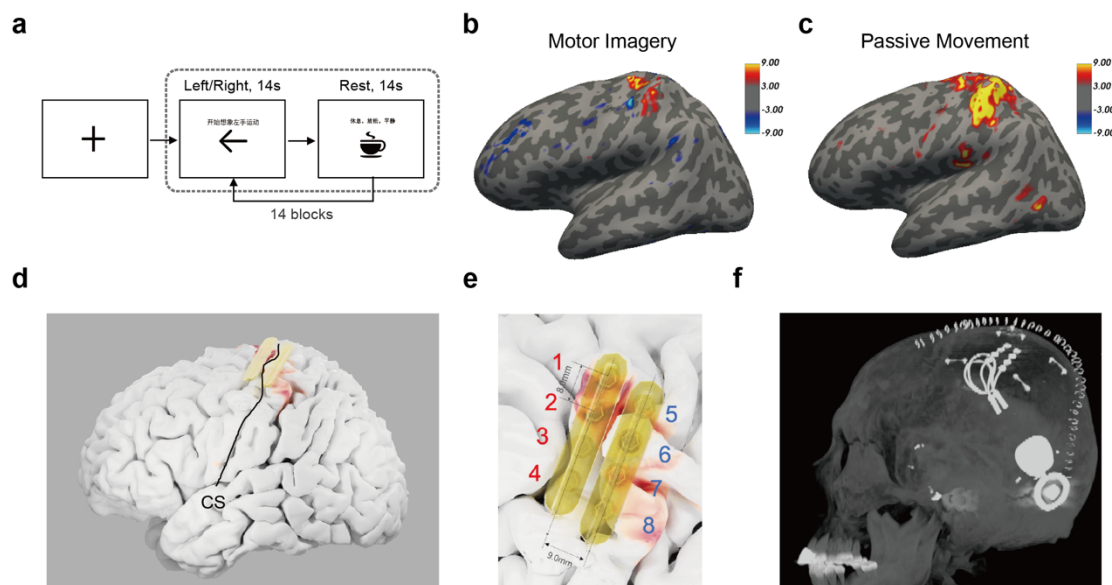

791  
 792 Extended Data Figure 2 fMRI Localization Paradigm and Surgical Planning. a, fMRI functional  
 793 localization paradigm, including alternating rest and movement states of the left or right hand. b-c,  
 794 Functional activation during motor imagery (b) and passive movement (c), with activation values  
 795 represented as  $-lg(p)$ . d, Electrode planning. e, Enlarged view of the diagram of the planned  
 796 electrodes. Electrodes 1-4 were located on the precentral gyrus and electrodes 5-8 on the postcentral  
 797 gyrus. f, Sagittal View of postoperative CT, showing the actual implantation positions. CS: Central  
 798 Sulcus.

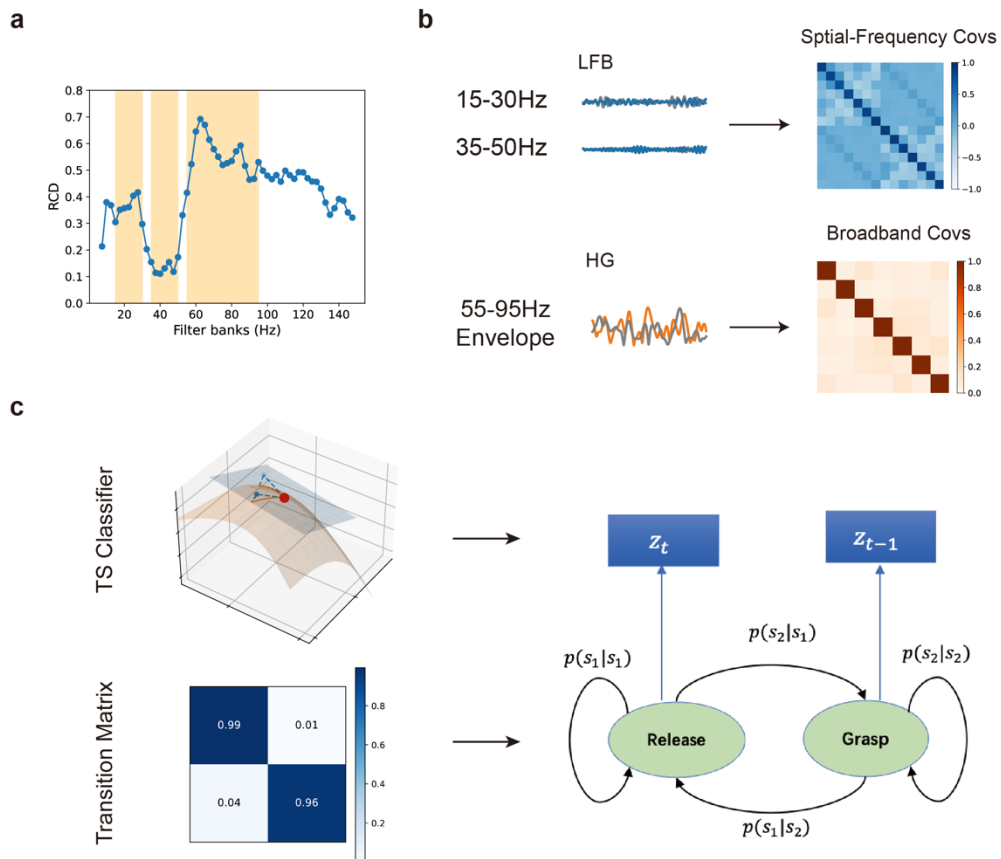

799

800 Extended Data Figure 3 Brain-Computer Interface Decoding Methods. a, Band selection using  
 801 Riemannian class distinctiveness (RCD) across different frequency bands. b, Construction of the  
 802 covariance feature matrix using low-frequency band-pass filter features and high-frequency envelope  
 803 features. c, Decoding framework for natural grasping based on the Hidden Markov Model (HMM),  
 804 utilizing the temporal dependence of grasp states to ensure the reliability of continuous grasping. The  
 805 observation model is based on the trained Riemannian geometry classifier, and the transition matrix is  
 806 fitted based on patient behavior data. TS Classifier: Tangent Space Classifier.

807

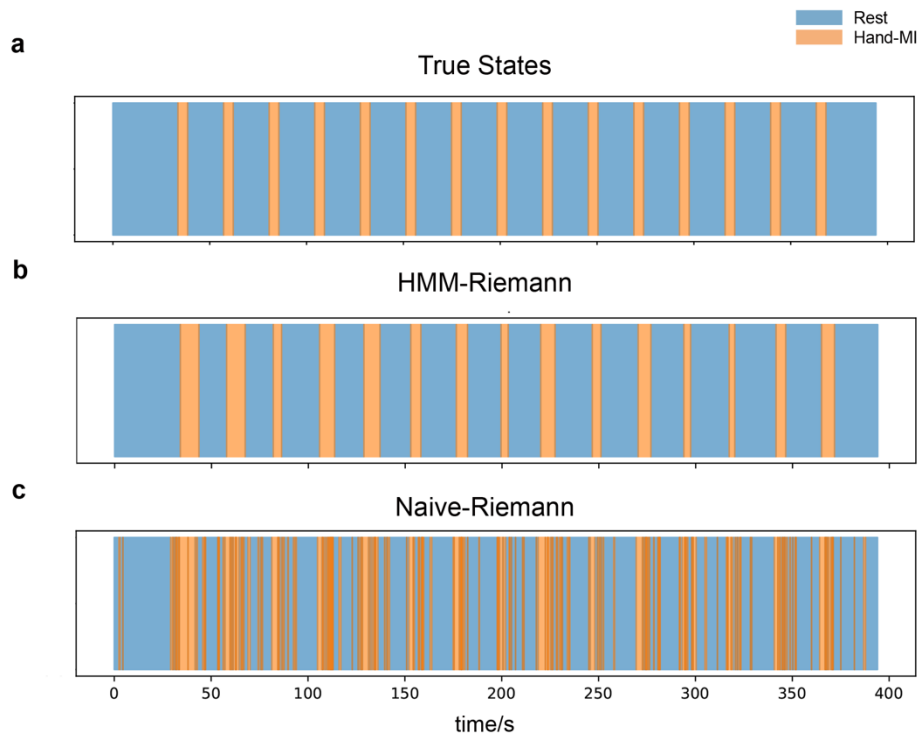

808

809 Extended Data Figure 4 Illustration of HMM decoding. a, Actual motor imagery cues. b, Continuous  
 810 grasping decoded by the HMM-Riemann method. c, Continuous grasping decoded by the Naïve-  
 811 Riemann method without HMM. Hand-MI: Hand Motor Imagery.

812

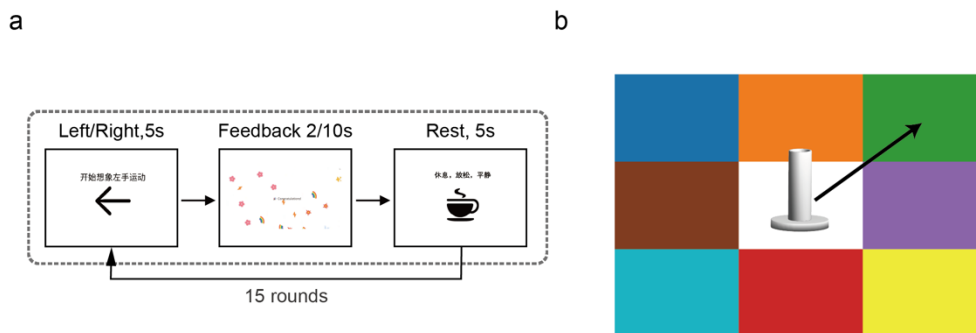

813

814 Extended Data Figure 5 Calibration and Training Paradigms. a, BCI calibration paradigm. b, Free grasp  
 815 BCI testing paradigm, where the patient needs to move the standard cylinder from the center to the grid  
 816 designated by the experimenter.

817

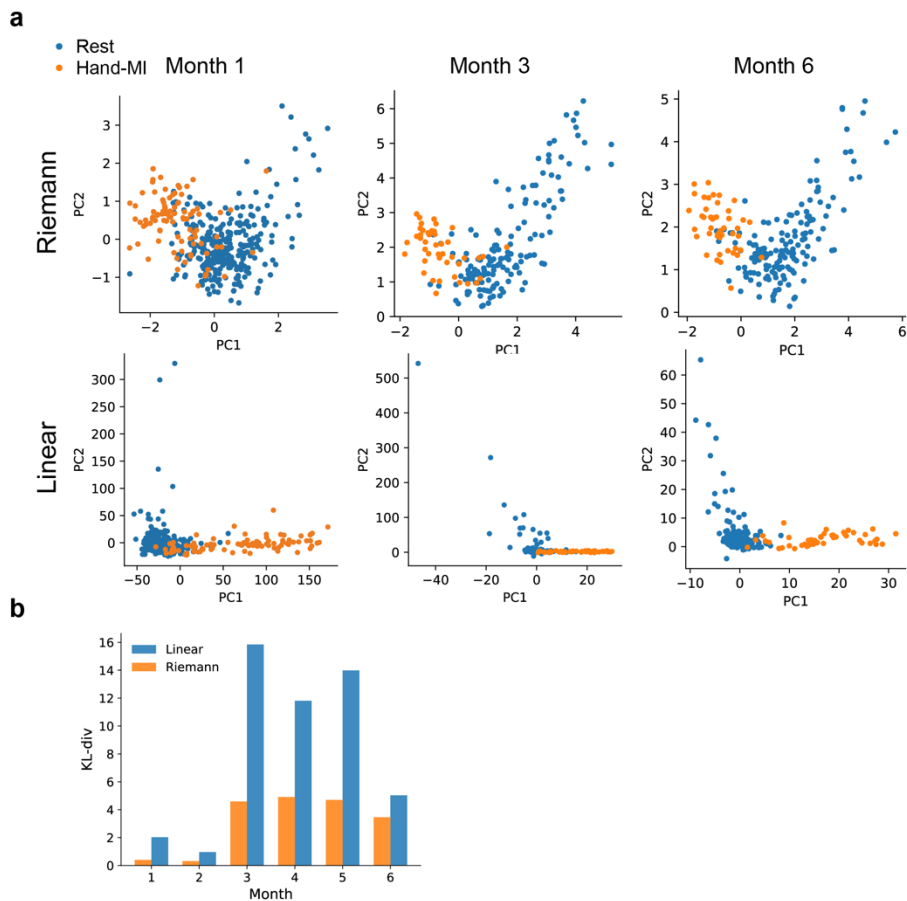

818

819 Extended Data Figure 6 Changes in epidural ECoG Feature Distribution During Long-term Use. a,

820 Scatter plots of PCA-embedded distributions of Riemannian features and linear spatio-temporal-spectral

821 features across different months. b, Changes in KL divergence between Riemannian features and linear

822 spatio-temporal-spectral features compared to training data over different months. The stability of

823 Riemannian features consistently surpasses that of linear spatio-temporal-spectral features. Hand-MI:

824 Hand Motor Imagery. KL-div: KL Divergence.

825

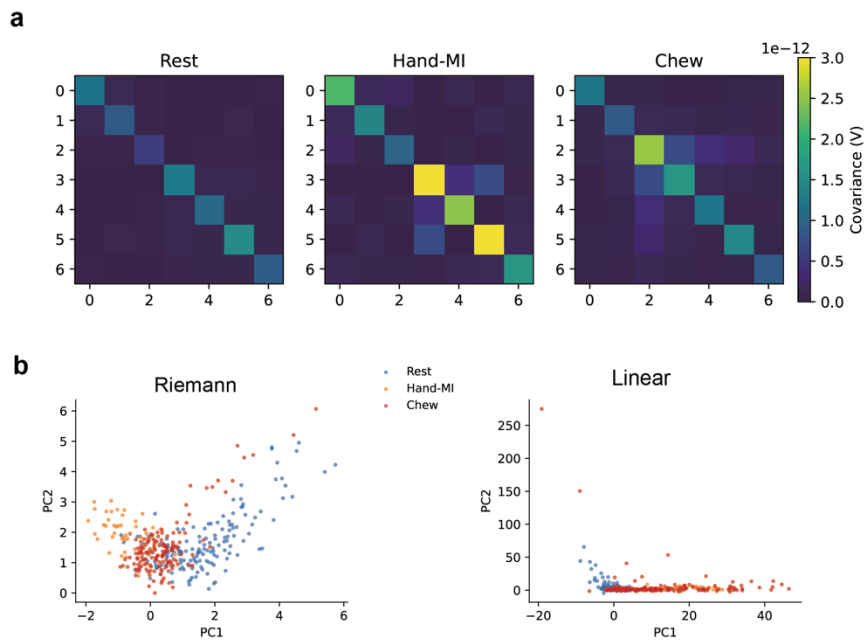

826

827 Extended Data Figure 7 EMG Noise Pattern. a, Average covariance patterns of resting, motor imagery  
828 (Hand-MI), and EMG noise. b, Dimensionality-reduced spatial distribution patterns of Riemannian  
829 embedded features (left) and linear spatio-temporal-spectral features (right). Under Riemannian metrics,  
830 chewing EMG noise is positioned between resting and hand motor imagery; in linear spatio-temporal-  
831 spectral features, chewing noise highly overlaps with hand motor imagery distribution.

832

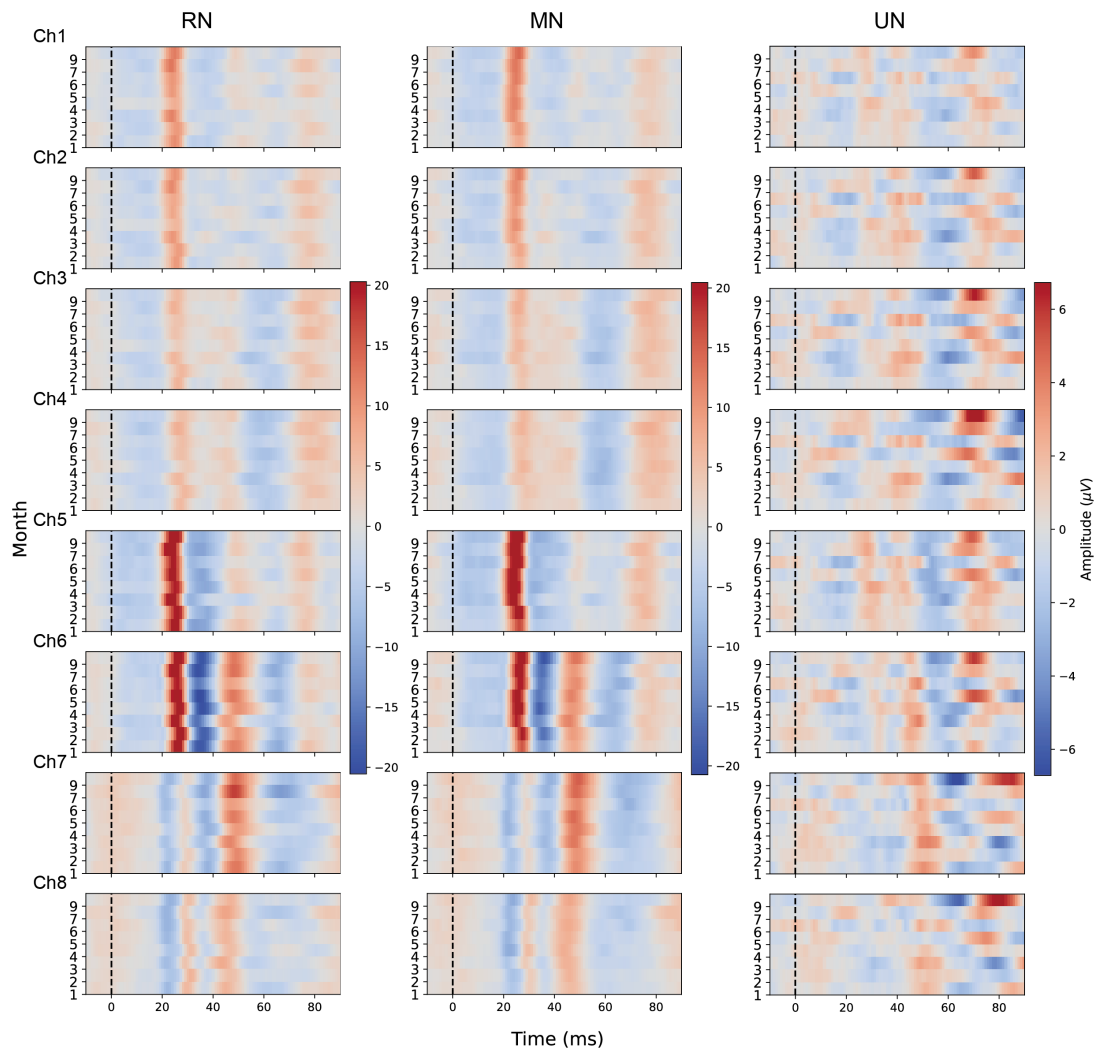

833

834 Extended Data Figure 8 Average Somatosensory Evoked Potential (SEP) Waveforms for Each Nerve,  
835 Channel, and Month. From top to bottom: Ch1-Ch8.

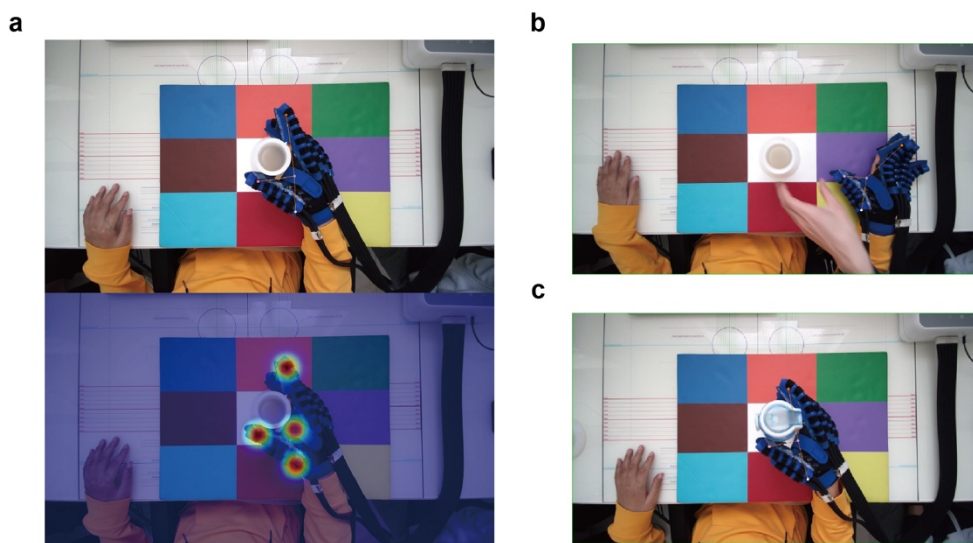

836

837 Extended Data Figure 9 Pneumatic Hand Keypoint Detection Model. a, Example of a detection  
838 heatmap. b-c, Examples of detection results.

839

| Time                                                      | Pre-Operation | Month 3 | Month 4 | Month 5 | Month 6 | Month 7 | Month 9 |
|-----------------------------------------------------------|---------------|---------|---------|---------|---------|---------|---------|
| American Spinal Injury Association Impairment Scale (AIS) | A             | A       | A       | A       | A       | A       | A       |
| Neurological level of injury                              | C4            | C4      | C4      | C4      | C4      | C4      | C4      |
| Upper Extremity Motor Score                               |               |         |         |         |         |         |         |
| C5, (Left   Right)                                        | 4   4         | 4   4   | 4   5   | 4   5   | 4   5   | 4   5   | 5   5   |
| C6, (Left   Right)                                        | 3   3         | 3   3   | 3   3   | 3   4   | 3   3   | 3   3   | 3   4   |
| C7, (Left   Right)                                        | 2   2         | 2   2   | 2   3   | 2   2   | 2   2   | 2   3   | 2   3   |
| C8, (Left   Right)                                        | 0   0         | 0   0   | 0   0   | 0   0   | 0   0   | 1   0   | 0   1   |
| T1, (Left   Right)                                        | 0   0         | 0   0   | 0   0   | 0   0   | 0   0   | 0   0   | 0   0   |
| Total, (Left   Right)                                     | 9   9         | 9   9   | 9   11  | 9   11  | 9   10  | 10   11 | 10   13 |
| Light Touch Sensory Score                                 |               |         |         |         |         |         |         |
| Total, (Left   Right)                                     | 7   8         | 9   7   | 8   9   | 11   9  | 7   7   | 7   7   | 7   7   |
| Pin Prick Sensory Score                                   |               |         |         |         |         |         |         |
| Total, (Left   Right)                                     | 6   7         | 10   8  | 10   8  | 11   8  | 10   9  | 11   10 | 11   11 |
| Deep Anal Pressure                                        | No            | No      | No      | No      | No      | No      | No      |
| Voluntary Anal Contraction                                | No            | No      | No      | No      | No      | No      | No      |

840

Extended Data Table 1 ISNCSCI Scores

841

842

|     | RN     |        | MN      |         | UN     |         |
|-----|--------|--------|---------|---------|--------|---------|
|     | Early  | Late   | Early   | Late    | Early  | Late    |
| Ch1 | 0.2461 | 0.0901 | <0.0001 | 0.0746  | 0.1579 | 0.0069  |
| Ch2 | 0.2369 | 0.2654 | <0.0001 | 0.1905  | 0.3035 | 0.0007  |
| Ch3 | 0.2555 | 0.0479 | 0.0235  | 0.0119  | 0.2198 | <0.0001 |
| Ch4 | 0.1068 | 0.0021 | 0.0396  | 0.0381  | 0.1161 | <0.0001 |
| Ch5 | 0.0078 | 0.9957 | <0.0001 | 0.1021  | 0.2586 | 0.0013  |
| Ch6 | 0.5814 | 0.9572 | <0.0001 | <0.0001 | 0.1724 | <0.0001 |
| Ch7 | 0.3704 | 0.184  | 0.0176  | <0.0001 | 0.3169 | 0.0001  |
| Ch8 | 0.3518 | 0.9889 | <0.0001 | 0.0001  | 0.2373 | <0.0001 |

843

Extended Data Table 2 p-values for Increases in Average Amplitudes of Early and Late SEP Components for Different Nerves from Month 1 to Month 9 with Electrical Stimulation.

844

845

846

|                   | Baseline |   | Month 3 |   | Month 5 |    | Month 7 |   | Month 9 |    |
|-------------------|----------|---|---------|---|---------|----|---------|---|---------|----|
|                   | L        | R | L       | R | L       | R  | L       | R | L       | R  |
| <b>Grasp (18)</b> | 6        | 4 | 5       | 6 | 6       | 10 | 6       | 9 | 12      | 13 |

|                   |    |    |    |    |    |    |    |    |    |    |
|-------------------|----|----|----|----|----|----|----|----|----|----|
| <b>Grip (12)</b>  | 6  | 6  | 6  | 6  | 6  | 6  | 6  | 6  | 7  | 10 |
| <b>Pinch (18)</b> | 2  | 2  | 2  | 2  | 4  | 4  | 3  | 4  | 5  | 6  |
| <b>Gross (9)</b>  | 7  | 9  | 8  | 9  | 8  | 8  | 8  | 8  | 8  | 8  |
| <b>Total (57)</b> | 21 | 21 | 21 | 23 | 24 | 28 | 23 | 27 | 32 | 37 |

Extended Data Table 3 ARAT scores

847

848

849

850 **Extended Data Video 1 NEO System Overview.**

851 This video outlines the basic setup of the NEO brain-computer interface (BCI) system. First, the  
852 NEO implant is powered on. Next, the pneumatic hand is attached and configured. Once connected  
853 to the controller, the NEO system transmits epidural ECoG signals in real-time. Finally, the subject  
854 is able to control the pneumatic hand using his thoughts. Link to view online:

855 <https://cloud.tsinghua.edu.cn/f/af0fb0644b43496fa4e7/>

856

857 **Extended Data Video 2 ARAT Grasping Test.**

858 This video demonstrates the subject's improvement in hand function following a 9-month training  
859 period. It compares the subject's performance on ARAT tasks before surgery (baseline) and at the  
860 9-month mark for both hands. For the right hand, grasping tasks involving 2.5 cm, 5 cm, and 7.5  
861 cm cubes, as well as a 7.5 cm sphere, are compared between the baseline and 9th month. For the  
862 left hand, the grasping task with a sharpening stone is evaluated. Link to view online:

863 <https://cloud.tsinghua.edu.cn/f/958b6cad79dd42c4ad12/>

864

865 **Extended Data Video 3 NEO for Hand Function Assistance.**

866 This video demonstrates how the NEO system assists in hand function. With the help of the BCI  
867 system, the subject successfully lifts a bottle of water and moves it to the designated target area.  
868 Link to view online:

869 <https://cloud.tsinghua.edu.cn/f/e8661aa219b14a988a43/>

870

871 **Extended Data Video 4 NEO for Independent Home Use.**

872 This video highlights how the NEO system enhances the subject's daily life. Using the NEO system,  
873 the subject can independently eat with a customized fork and drink from either a plastic bottle or  
874 glass. Link to view online:

875 <https://cloud.tsinghua.edu.cn/f/836149c8500441c3abd8/>

876
