# 1 Reclaiming Motor Functions after Complete Spinal Cord Injury with 2 Epidural Minimally Invasive Brain-Computer Interface

3  
4 Dingkun Liu, Ph.D.<sup>1#</sup>, Yongzhi Shan, M.D., Ph.D.<sup>2#</sup>, Penghu Wei, M.D., Ph.D.<sup>2#</sup>, Wenzheng Li,  
5 M.S.<sup>1</sup>, Honglai Xu, Ph.D.<sup>3</sup>, Fangshuo Liang, B.S.<sup>1</sup>, Tao Liu, M.S.<sup>3</sup>, Guoguang Zhao, M.D., Ph.D.<sup>2\*</sup>,  
6 Bo Hong, Ph.D.<sup>1\*</sup>

7  
8 <sup>1</sup>Department of Biomedical Engineering, School of Biomedical Engineering, Tsinghua University,  
9 Beijing, China.

10 <sup>2</sup>Department of Neurosurgery, Xuanwu Hospital of Capital Medical University, National Medical  
11 Center for Neurological Diseases, Beijing, China.

12 <sup>3</sup>Neuracle Technology Co., Shanghai, China.

13  
14 # Equal contribution

15 \* Corresponding author

16  
17 E-mail: [hongbo@tsinghua.edu.cn](mailto:hongbo@tsinghua.edu.cn)

## 18 19 20 21 22 **Abstract:**

### 23 **Background:**

24 Spinal cord injuries significantly impair patients' ability to perform daily activities independently.  
25 While invasive brain-computer interfaces (BCIs) offer high communication bandwidth to assist and  
26 rehabilitate these patients, their invasiveness limits broader adoption.

### 27 **Methods:**

28 We developed a minimally invasive BCI system that balances safety and communication bandwidth  
29 to restore hand functions of tetraplegia patients. This system enables real-time, precise control of  
30 hand movements and hand function rehabilitation. A complete spinal cord injury (SCI) patient with  
31 deficit hand functions was recruited in this study.

### 32 **Results:**

33 The system required less than 10 minutes of calibration time and maintained an average grasping  
34 detection F1-score of 0.91 over a 9-month period of home use. With the assistance of the brain-  
35 computer interface, the patient can achieve a 100% success rate in object transfer tests, and  
36 successfully perform daily tasks involving hand functions. Additionally, the patient showed  
37 substantial neurological recovery through consecutive BCI training, regaining the ability to hold  
38 objects without BCI assistance. The patient exhibited a 5-point improvement in upper limb motor  
39 scores and a 27-point increase in the Action Research Arm Test (ARAT). Improvements in

40 NOTE: This preprint reports new research that has not been certified by peer review and should not be used to guide clinical practice.

41 **Conclusions:**

42 In a tetraplegia patient with complete spinal cord injury, an epidural minimally invasive BCI  
43 assisted the patient's hand grasping to perform daily tasks, and 9-month consecutive BCI use  
44 significantly improved the hand functions.  
45

## 46 Introduction

47 Spinal cord injuries (SCI) can lead to permanent paralysis of the limbs, especially when the injury  
48 occurs in the cervical region, resulting in the loss of motor function in all four limbs. Implantable  
49 brain-computer interfaces (BCIs) present a novel solution to help patients regain some motor  
50 functions<sup>1,2</sup>. Combined with epidural spinal cord stimulation systems, these interfaces can  
51 facilitate functional rehabilitation<sup>3,4</sup>. Current research on implantable BCIs primarily focuses on  
52 increasing their communication bandwidth. However, the long-term efficacy and reliability of  
53 these systems are often constrained by safety concerns<sup>5,6</sup>. Few studies have investigated how to  
54 enhance the safety of implantable BCIs to achieve an optimal balance between communication  
55 bandwidth and safety. Additionally, BCIs combined with epidural spinal cord stimulation have  
56 been shown to enhance axonal excitability, induce closed-loop electrical activity, and promote  
57 active rehabilitation of the brain-spinal cord pathways. This combination can potentially restore  
58 voluntary walking abilities in patients<sup>3,7</sup>. However, it remains unclear whether the brain-spinal  
59 cord pathways can autonomously recover through BCI-induced sensory and motor feedback  
60 without external electrical stimulation.

61 In our previous research, we designed and validated a brain-computer interface (BCI) system  
62 called NEO (Neural Electrical Opportunity) using epidural electrodes and wireless communication  
63 in animal models. The NEO system ensures long-term safety and effectiveness through its battery-  
64 free, bidirectional design and epidural electrodes that keep the brain tissue intact.

65 In this study, we utilized the NEO system to develop a long-term hand movement assistance  
66 system for a patient with complete C4 spinal cord injury resulting in tetraplegia. We investigated  
67 whether neural rehabilitation could be achieved through the coupling of cortical descending  
68 control signals and ascending sensory signals at the injury site, without relying on external  
69 electrical stimulation.

## 70 Methods

### 71 The Epidural Minimally Invasive BCI

72 To create a balanced bridge between bandwidth and safety in brain-upper limb control, we  
73 designed an epidural wireless minimally invasive brain-computer interface (BCI) system, named  
74 NEO.

75 The implantable part of the NEO system consists of a titanium alloy implant, a coil, and epidural  
76 electrodes. The entire system is sealed with silicone material (Fig. 1b). Two epidural electrode  
77 strips are connected to the implant via electrode adaptors, with each electrode strip featuring four  
78 contacts capable of both recording and stimulating. These eight electrode contacts have a diameter  
79 of 3.2 mm and a center-to-center distance of 8 mm. The system operates at a sampling rate of 1  
80 kHz. It includes two sets of coils: the first set supplies power through near-field coupling, and the  
81 second set transmits collected neural signals via Bluetooth.

82 This design has two main characteristics. First, it employs minimally invasive epidural electrodes.  
83 These electrodes, placed on the dura mater, without penetrating the dura, preventing a strong  
84 immune response and ensuring long-term effectiveness. Second, the system utilizes bidirectional  
85 wireless communication for both power and information transmission (Fig. 1c). Wireless  
86 communication reduces the risk of infection by eliminating the need for open wounds. The  
87 implant does not contain a battery; instead, it is powered wirelessly via the coils, which also  
88 handle bidirectional data transmission. This battery-free design ensures that the device's lifespan  
89 is not limited by battery life. While a similar design has been widely adopted in cochlear  
90 implants<sup>8</sup>, it has not yet been reported in the field of implanted brain-computer interfaces.

91 Signals are received by a relay station attached to the arm and transmitted to a computer via  
92 Bluetooth or WIFI. The computer decodes the patient's motor control signals continuously from  
93 the neural data and drives an external pneumatic glove (Fubo Co.) (Fig. 1a, Video 1). When the  
94 patient imagines grasping and holding, the pneumatic glove grasps; when the patient imagines  
95 relaxing, the glove extends to release the objects.

## 96 Study Participant

97 This study is part of a clinical trial for the implantable closed-loop BCI system (NEO)  
98 (clinicaltrials.gov, NCT05920174), which was approved by the Xuanwu Hospital Ethics  
99 Committee in April 2023. We recruited a patient in his 50s who suffered a spinal cord injury in a  
100 car accident more than 10 years, resulting in limited hand motor function, making grasping,  
101 holding, and pinching actions impossible (Video 2). Prior to NEO implantation, the patient  
102 underwent a neurological assessment and was diagnosed with complete C4 spinal cord injury  
103 (AIS-A, Table S1, Fig. S1).

104 Informed consent was obtained from the participant with the use of an informed-consent form that  
105 was approved by the institutional review board at Xuanwu Hospital of Capital Medical University.

## 106 Precise Implantation of Minimally Invasive BCI

107 To obtain the most informative neural signals related to hand grasping with a minimal number of  
108 electrodes, we performed preoperative planning for the BCI electrode implantation using  
109 functional MRI (fMRI). Research indicates that the transmission of ascending signals is crucial for  
110 SCI rehabilitation<sup>9</sup>. Therefore, our paradigm included fMRI imaging of both active and passive  
111 grasping attempts. The active grasping paradigm requires the subject to perform motor imagery  
112 based on visual cues, whereas the passive grasping paradigm requires the subject to perceive the  
113 sensation of the experimenter assisting him in grasping and releasing. The active grasping  
114 paradigm localized the sensory-motor area responsible for the patient's hand, while the passive  
115 grasping paradigm assessed the residue ascending sensory signals (Fig. S2). Additionally, we  
116 collected CT and structural MRI images of the patient to determine the implantation site.

117 The significant activation regions were projected from the fMRI onto a 3D model of the cortex,  
118 using 3D modeling software to simulate electrode placement (Fig. S2). The position of the implant  
119 was determined using skull structure obtained from CT images, selecting an area with suitable

120 thickness. The final plan was then output to a surgical navigation system to guide the implantation  
121 procedure.

122 The minimally invasive BCI implantation surgery was completed in October 2023. Conducted  
123 under general anesthesia, a coronal incision was made on the left scalp to place the internal  
124 device, coil, and electrode strips. Following the preoperative plan, a circular window was created  
125 in the skull, exposing the dura mater, and the electrodes were sutured onto the dura mater  
126 according to the planned positions. The bone flap was then repositioned and secured. A 3-4 mm  
127 deep groove was created on the skull surface to embed the titanium alloy implant, which was fixed  
128 using bone screws, and the incision was closed. The patient was discharged within 24 hours after  
129 all clinical observations were completed.

130 Postoperatively, we extracted the electrode positions from the patient's postoperative CT images  
131 and registered them to the preoperative MRI images, obtaining a map of the eight electrode  
132 positions. The first four electrodes were placed above the precentral gyrus, while the latter four  
133 were above the postcentral gyrus. Electrodes 2-3 (Brodmann area 6d) in the precentral gyrus and  
134 electrodes 7-8 (Brodmann area 1) in the postcentral gyrus covered the most prominently activated  
135 hand areas identified by fMRI during hand movement imagination (Fig. 1d, Fig. S2).

## 136 Decoding Brain-controlled Grasping Events

137 Based on our analysis on long-term epidural electrocorticography (eECoG) data (see Results:  
138 Long-term Characteristics of Epidural Signals), we confirmed the wideband characteristics of  
139 minimally invasive eECoG, which provides spatial resolution between subdural ECoG (sECoG)  
140 and scalp EEG. We also observed that the signal amplitude improves with continuous training. To  
141 accurately decode the patient's natural grasping movement intention, our decoder needs to  
142 integrate multi-band frequency information, restore source space activity, and maintain invariance  
143 to signal amplitude over long periods.

144 Firstly, eECoG features were extracted by combining both spatial and spectral information into a  
145 covariance matrix. To address long-term distribution shift in neural features<sup>10</sup>, scale-invariant  
146 Riemannian metrics was utilized for classification (see Appendix: Spatio-Spectral Riemannian  
147 Geometry Decoding Method). Secondly, a hidden Markov model (HMM) was employed to  
148 manage the temporal dependencies of continuous grasping actions, ensuring prediction accuracy  
149 and stability (Fig. S3 and S4). This approach was compared with two commonly used BCI  
150 decoding methods: a linear method, which uses linear spatio-temporal-spectral features<sup>1</sup>, and the  
151 Common Spatial Pattern (CSP) method<sup>11</sup>, which uses multi-band spatial patterns (see Appendix:  
152 The Control Decoding Methods).

## 153 Assessment of functional and neurological recovery

154 The regeneration of spinal connections induced by neuroplasticity from electrical activity has been  
155 demonstrated in relevant literature<sup>3,12,13</sup>. In this study, descending neural activity was generated by  
156 voluntary movement intention from the sensorimotor cortex, while ascending signals from muscle  
157 sensory feedback associated with pneumatic hand grasping. Compared with epidural electrical

158 stimulation over spinal cord to activate downstream muscles<sup>3</sup>, our BCI driven process is more  
159 likely to trigger bi-directional neuronal coupling at injury sites. To validate this hypothesis, we  
160 introduced electrophysiological measurements and neurological scales to evaluate the  
161 effectiveness of the rehabilitation.

162 Somatosensory Evoked Potentials (SEPs) are used to assess sensory information conduction. SEPs  
163 are elicited by electrically stimulating peripheral nerves, and the resulting neural activity travels  
164 through the sensory pathways to the corresponding areas of the brain, such as the precentral and  
165 postcentral gyri. Thus, SEPs reflect the transmission of sensory information from peripheral  
166 muscles through the spinal cord to the brain, making them a useful tool for evaluating the extent  
167 of spinal cord injury and the progress of recovery<sup>14,15</sup>. SEP testing involves stimulating the  
168 median, radial, and ulnar nerves of the patient's right arm (corresponding to C6-T1, C5-C8, and  
169 C8-T1, respectively) with a constant current and recording the SEPs from the precentral and  
170 postcentral gyri using the NEO epidural electrodes (Fig. 4a).

171 In this study, we employed two key assessments to quantify the neurological and functional  
172 recovery of the subject. The International Standards for Neurological Classification of Spinal Cord  
173 Injury (ISNCSCI) scale<sup>16</sup> was used to evaluate the overall neurological status, including motor and  
174 sensory capabilities, which is vital for determining the extent of spinal cord damage and subsequent  
175 recovery. Additionally, the Action Research Arm Test (ARAT) scale<sup>17</sup> was utilized to assess the  
176 finer aspects of hand function, focusing on the subject's ability to handle objects, which is crucial  
177 for evaluating the recovery of subtle motor skills of the upper limbs. These scales provided a  
178 quantifiable measure for monitoring the improvements in neurological function and hand dexterity  
179 over the course of the study.

## 180 Results

### 181 Long-term Characteristics of Epidural Brain Signals

182 Generally, brain electrophysiological recordings can be divided into three distinct levels: scalp  
183 electroencephalography (EEG), subdural electrocorticography (sECoG), and action potential  
184 recordings. These methods vary in safety and signal quality, with EEG being the safest but having  
185 the lowest signal quality, and action potential recordings being the most invasive but offering the  
186 highest signal quality. We propose that eECoG represents a fourth type, which theoretically  
187 provides higher safety than sECoG<sup>6</sup> and is considered minimally invasive. Its spatio-temporal-  
188 spectral characteristics are distinct from the other three methods. However, long-term eECoG  
189 recordings have been scarce. With NEO BCI system, we obtained substantial amount of eECoG  
190 signals for the first time. By analyzing these signals' characteristics in spatial, temporal and  
191 spectral domains, we can guide the design of decoding methods for epidural minimally invasive  
192 BCI.

193 Fig. 1e shows the average event-related spectrum perturbation (ERSP) pattern of 1700 trials of  
194 imagined hand grasping versus rest by the patient. The spectrum pattern exhibits a typical dual-  
195 frequency feature, including low-frequency (15-50 Hz) event-related desynchronization (ERD)  
196 and high-frequency (>50 Hz) event-related synchronization (ERS).

197 We compared the spatio-temporal-spectral characteristics of the patient's epidural ECoG with  
198 subdural ECoG datasets<sup>18</sup>, the patient's own scalp EEG, and a published EEG dataset<sup>19</sup>. Scalp  
199 EEG showed no significant ERSP from the low gamma (>40 Hz) frequency band onwards  
200 ( $p=0.42$ , independent t-test, Fig. 2a). Both epidural and subdural ECoG exhibited low-frequency  
201 ERD and high-frequency ERS effects. It is particularly noteworthy that the frequency upper limit  
202 of eECoG can exceed 200 Hz, which is significantly higher than that of scalp EEG (Fig. 2a). The  
203 power spectral density of eECoG was lower than that of sECoG in different frequency bands but  
204 higher than that of scalp EEG in the high-frequency range (20-75 Hz) (Fig. 2b). Spatially, by  
205 comparing the relationship between channel correlation and electrode distance, we qualitatively  
206 verified the spatial resolution differences among different levels of these three types of recordings.  
207 The correlation between EEG channels decreased slowly with increasing electrode distance,  
208 indicating lower spatial resolution. The correlation between sECoG channels decreased most  
209 rapidly with increasing electrode distance, indicating the highest spatial resolution, with eECoG  
210 showing moderate spatial resolution (Fig. 2c).

211 In contrast to the signal degradation frequently observed in action potential based BCI studies, in  
212 the current epidural BCI setting, the quality of long-term eECoG signals improved continuously  
213 with training. All electrodes' high gamma (HG) responses significantly increased over nine  
214 months of training ( $p<0.001$ , independent t-test, Fig. 2d), including the electrode no. 8 (Brodmann  
215 area 4) which showed the strongest HG response during imagined hand movement. The ERSP  
216 effects of electrodes in both the precentral and postcentral gyrus during imagined hand movement  
217 also continuously enhanced with training (Fig. 2e-f). Additionally, the HG energy during resting  
218 states significantly increased with time ( $p<0.001$ , independent t-test, Fig. 2h). We continuously  
219 measured the epidural electrode impedance to monitor alterations in the patient's intracranial  
220 environment post-surgery. The results showed only a slight increase in electrode impedance (<600  
221  $\Omega$ ), which gradually stabilized after 15 weeks (Fig. 2g).

## 222 BCI-assisted Natural Grasping

223 Based on the characteristics of eECoG, beta band (15-30Hz) and low gamma band (35-50Hz)  
224 filtered signal, and high gamma (55-95Hz) power envelope were extracted to train a Riemannian-  
225 based classifier. The BCI calibration was made within 10 minutes using a block design paradigm  
226 alternating between imagined grasping and resting. For the BCI testing and rehabilitation training  
227 task, the patient was instructed to use motor imagery to control a wearing pneumatic hand to move  
228 an object from the center of a 3x3 grid to one of the eight surrounding cells (Fig. 3a, Fig. S5).  
229 After 10 minutes of calibration, the patient achieved a decoding accuracy of 94% (Chance level:  
230 77%) and a grasp event detection F1 score (see Appendix: Model Training and Evaluation) of 0.8  
231 (Chance level: 0.09). The continuous increase in the patient's high-frequency amplitude of eECoG  
232 usually affects the classification accuracy of linear decoders, but has minimal impact on our  
233 Riemannian-based classifier<sup>10</sup>. Over nine months, the patient's grasp event F1 score steadily  
234 increased, surpassing 0.9 after three months (Fig 3i). The long-term stability of the Riemannian  
235 method was superior to both Linear and CSP methods, with the F1 score consistently improving  
236 (Fig. 3i) and feature distribution shifts being less pronounced (Fig. S6). After 6 months of training,  
237 the subject's capability of grasping with the help of the BCI system was evaluated. In the 3x3 grid  
238 test, the success rate was 100% within 10 seconds with BCI grasping, compared to 35% without it



239 (Fig. 3b-d, 181-185 days after implantation, Video 3). The model's consistent and accurate  
240 predictions during the autonomous grasping demonstrate the effectiveness of the BCI system.  
241 With BCI assistance, the dwelling time during grasping was distributed between the start and end  
242 points, while without assistance, it was mostly around the start point, indicating smoother grasping  
243 with BCI assistance (Fig. 3e-f, h). We compared the performance of our system using EEG  
244 collected from the subject. The grasp event F1 score for the EEG-based decoder was only  
245  $0.16 \pm 0.11$  (s.d.) (Chance level: 0.07), while for the eECoG it was  $0.90 \pm 0.06$  (s.d.) (Chance level:  
246 0.09) (Fig. 3g). Notably, the average latency decoding was  $1.23 \pm 0.33$ s, which is much lower than  
247 the EEG based motor imagery BCIs<sup>20,21</sup>.

248 In a home setting, the BCI can assist with various tasks requiring grasping. However, activities  
249 like eating and drinking usually elicit significant electromyographic (EMG) noise, which  
250 interferes with the decoder. Since the spatial distribution of EMG noise differs from that of  
251 grasping movements, the Riemannian geometry method, which is highly sensitive to spatial  
252 patterns, can filter out noise without supervised training (Fig. S7). Compared to the Riemannian  
253 geometry method, the Linear and CSP methods had a false activation rate (FAR) of 100% during  
254 chewing, while the Riemannian geometry method had a FAR of only 20% (Fig. 3j). Using the  
255 Riemannian geometry BCI decoder, the patient could perform grasp-related daily tasks such as  
256 eating and drinking (Video 4, 267 days after implantation).

## 257 Hand Function Rehabilitation and Electrophysiology Assessment

258 We hypothesis that top-down neural electrical activity from the central and bottom-up sensory  
259 feedback from the peripheral during BCI grasping can direct the neuronal projections at the spinal  
260 cord injury sites that may facilitate neural rehabilitation<sup>7,22</sup>. Indeed, during nine months of  
261 continuous training, significant neurophysiological and functional recovery was observed in the  
262 patient. Changes in SEP signals from the radial, median, and ulnar nerves correspond to the  
263 recovery of the sensory pathways at different levels of the spinal cord. The strongest and most  
264 stable SEP responses were observed in electrode no.5 at Brodmann area 4 (Fig. 4b, Fig. S8). The  
265 radial nerve corresponds to spinal segments (C5-T1, mostly C5) above the zone of partial  
266 preservation (C5-C7), the median nerve (C5-T1, mostly C6) is near the zone of partial  
267 preservation, and the ulnar nerve (C7-T1) is below it<sup>23</sup>. Consequently, it is expected that SEPs  
268 from the radial nerve will not show significant change, while SEPs from the median nerve will  
269 show some improvement, and SEPs from the ulnar nerve might show less improvement. Over 9  
270 months, the amplitude of SEPs elicited by median nerve stimulation in channel no. 5 increased  
271 significantly, whereas the radial nerve did not show significant changes (Fig. 4c). Comparing the  
272 first and ninth months, the mean amplitude of early (15-35ms) and late (40-80ms) components of  
273 median nerve SEPs increased significantly across most channels. The late component of ulnar  
274 nerve SEPs increased significantly in most channels, but the early component did not show a  
275 significant increase. The radial nerve showed no significant increase for either component in all  
276 channels but channel 4, which showed a significant increase for late component (Fig. 4d, Fig. S9,  
277 bootstrap permutation test, FDR corrected, statistical p-values in Table S2).

278 The patient's neurological scales and hand function assessment corresponded well with the SEP  
279 changes. The patient's upper limb motor score on the ISNCSCI scale increased by 5 points over



280 nine months, with changes concentrated in the C5-C8 segments, and the motor level dropping  
281 from C5 to C6. The sensory score increased by 8 points, peaking at 11 points in the fifth month,  
282 mostly in the C5-T4 segments (Fig. 5a-b, Table S1). The Action Research Arm Test (ARAT)  
283 scale, which evaluates hand functions, including grasp, grip, pinch and gross movements, showed  
284 a 16-point improvement in the patient's right hand and a 11-point improvement in the left hand  
285 after nine months. The main improvement was in the grasp score, with the trained right hand  
286 showing more improvement than the left hand (Fig. 5d, Table S3). For example, in the ARAT  
287 grasp test, the patient was able to grasp a 5 cm wooden block faster in the fifth month compared to  
288 the third month (3.9 s vs. 6.1 s) and was also able to successfully grasp a 7.5 cm wooden block in  
289 the fifth month (Fig. 5c, e-f). The patient completed the ARAT grasping part test before the  
290 surgery. Compared to the preoperative results, the grasping speed and success rate for 2.5 cm and  
291 5 cm wooden blocks were significantly improved five months after the surgery (Video 2). It is  
292 noteworthy that, due to the patient's use of Baclofen and Pregabalin in the sixth month, there was  
293 a sudden decrease in sensory and motor scores.

## 294 Discussion

295 This study presents the first human trial of a wireless minimally invasive epidural BCI system,  
296 with which a novel brain-spine rehabilitation pathway was established entirely based on the  
297 patient's intrinsic neural activities. This pathway enabled a patient with a complete C4 spinal cord  
298 injury to regain voluntary hand grasping function. Furthermore, active rehabilitation training using  
299 the BCI facilitated a prominent recovery of this voluntary grasping function. Significant and  
300 consistent improvements were observed in neurological scales, hand function assessments, and  
301 electrophysiological tests.

302 Implantable brain-computer interfaces often face a trade-off between communication bandwidth  
303 and safety. Typically, a higher channel number leads to higher bandwidth but lower safety. The  
304 wireless minimally invasive epidural BCI system developed in this study, featuring wireless  
305 power and transmission with a battery-free, closed-wound design, ensures long-term safety and  
306 stability for home use while effectively facilitating hand function restoration and rehabilitation.  
307 Although BCIs based on microelectrode implants can achieve similar functions, their long-term  
308 stability is limited by issues such as electrode displacement and glial cell encapsulation,  
309 necessitating frequent recalibration. Some BCIs using subdural cortical electrodes have been  
310 reported to maintain high long-term stability, requiring no recalibration for 2-6 months<sup>24,25</sup>.  
311 However, subdural electrodes pose a higher risk of adverse effects such as hematomas,  
312 intracranial hemorrhage, brain infarction, and cerebral edema due to direct pressure on brain  
313 tissue<sup>6,26</sup>. In contrast, minimally invasive epidural brain-computer interfaces offer significant  
314 advantages in long-term stability. The electrodes are placed outside the dura mater, providing  
315 structural support without damaging or compressing brain tissues. Consequently, the minimally  
316 invasive epidural electrodes exhibit better long-term stability, with signal quality improving over a  
317 nine-month period (Fig 2h). Additionally, decoding performance remains stable over nine months  
318 with only 10 minutes of calibration (Fig 3i).

319 In this study, we demonstrated for the first time that a minimally invasive BCI system, relying  
320 solely on the patient's intrinsic sensory ascending and motor descending signals, can likely direct  
321 the spinal circuit reconstruction, thus to facilitate the rehabilitation of upper limb functions in a  
322 patient with complete spinal cord injury. Previous studies have validated the effectiveness of  
323 brain-controlled spinal cord injury rehabilitation systems based on this principle<sup>3,27,28</sup>, but they  
324 largely depend on electrical stimulation of limbs<sup>28</sup> or the spinal cord<sup>3</sup> to induce recovery. Our  
325 research confirmed the feasibility of directly using the intrinsic ascending and descending neural  
326 activities to facilitate upper limb rehabilitation. Additionally, there is a hypothesis that electrical  
327 epidural stimulation of the spinal cord enhances the excitability of spinal nerves, thereby inducing  
328 neural circuit remodeling<sup>7,13</sup>. This method complements our approach and could be combined in  
329 the future to improve brain-controlled upper limb rehabilitation outcomes.

330 Our study also established a quantitative assessment method for neural function rehabilitation  
331 based on SEP (somatosensory evoked potential) using NEO system. The trend of changes in the  
332 amplitude of different SEP components was highly consistent with the patient's rehabilitation  
333 progress. At the sixth month, the patient was taking Baclofen and Pregabalin, both of which have  
334 inhibitory effects on the central nervous system. These medications exert global suppression on  
335 the central system, while SEP, as a primary cortical response to sensory information, is  
336 theoretically less affected by such medications compared to higher-level brain activities involved  
337 in subjective sensory perception. The results showed that SEP test outcomes were less disturbed  
338 than the sensory scores on the ISNCSCI scale, more accurately reflecting the connectivity of  
339 spinal neural circuits. Given that similar medications are commonly used by SCI patients, the  
340 stability of SEP provides a better assessment of the patient's sensory perception.

341 This study is a prospective investigation of a novel brain-computer interface, reporting results  
342 from a single subject. Consequently, the rehabilitation effects for patients with different injury  
343 locations or severities remain uncertain. However, our approach holds potential for application to  
344 other spinal cord injury patients. Firstly, the case we reported is an AIS-A level case, representing  
345 the most severe level of spinal cord injury. Patients with less severe injuries would have more  
346 residual spinal connections, providing higher chance for rehabilitation. Secondly, with nine  
347 months of home use, our system is proven to be highly reliable and scalable, with high decoding  
348 accuracy and long-term stability. Similar patients can quickly calibrate and use the system at home  
349 for long-term, effective rehabilitation training.

## 350 Acknowledgement

351 We thank our volunteer and his family for their commitment and trust. We thank Sichang Chen and  
352 Lin Liu from Xuanwu Hospital of Capital Medical University, Yujing Wang and Xiaoshan Huang  
353 from Neuracle Technology Co., Zheng Yan from Huaqiao University, Ze'ao Xiong, Ruwei Yao,  
354 Yunjing Li, Yujing Lin, Le Yu, Yichao Li from Tsinghua University, and Zhouxingyu Yan from John  
355 Hopkins University for their help in this work.

## 356 Reference

357 1. Benabid, A. L. *et al.* An exoskeleton controlled by an epidural wireless brain-machine interface

- 358 in a tetraplegic patient: a proof-of-concept demonstration. *Lancet Neurol.* **18**, 1112–1122 (2019).
- 359 2. Moses, D. A. *et al.* Neuroprosthesis for Decoding Speech in a Paralyzed Person with Anarthria.  
360 *N. Engl. J. Med.* **385**, 217–227 (2021).
- 361 3. Lorach, H. *et al.* Walking naturally after spinal cord injury using a brain–spine interface. *Nature*  
362 **618**, 126–133 (2023).
- 363 4. Samejima, S. *et al.* Brain-computer-spinal interface restores upper limb function after spinal cord  
364 injury. *IEEE Trans. Neural Syst. Rehabil. Eng.* **29**, 1233–1242 (2021).
- 365 5. Patel, P. R. *et al.* Utah array characterization and histological analysis of a multi-year implant in  
366 non-human primate motor and sensory cortices. *J. Neural Eng.* **20**, (2023).
- 367 6. Branco, M. P., Geukes, S. H., Aarnoutse, E. J., Ramsey, N. F. & Vansteensel, M. J. Nine decades  
368 of electrocorticography: A comparison between epidural and subdural recordings. *Eur. J.*  
369 *Neurosci.* **57**, 1260–1288 (2023).
- 370 7. Anderson, M. A. *et al.* Natural and targeted circuit reorganization after spinal cord injury. *Nat.*  
371 *Neurosci.* **25**, 1584–1596 (2022).
- 372 8. Zeng, F.-G., Rebscher, S., Harrison, W., Sun, X. & Feng, H. Cochlear Implants: System Design,  
373 Integration, and Evaluation. *IEEE Rev. Biomed. Eng.* **1**, 115–142 (2008).
- 374 9. Formento, E. *et al.* Electrical spinal cord stimulation must preserve proprioception to enable  
375 locomotion in humans with spinal cord injury. *Nat. Neurosci.* **21**, 1728–1741 (2018).
- 376 10. Congedo, M., Barachant, A. & Bhatia, R. Riemannian geometry for EEG-based brain-computer  
377 interfaces; a primer and a review. *Brain-Computer Interfaces* **4**, 155–174 (2017).
- 378 11. Koles, Z. J. The quantitative extraction and topographic mapping of the abnormal components  
379 in the clinical EEG. *Electroencephalogr. Clin. Neurophysiol.* **79**, 440–447 (1991).
- 380 12. Inanici, F., Brighton, L. N., Samejima, S., Hofstetter, C. P. & Moritz, C. T. Transcutaneous  
381 Spinal Cord Stimulation Restores Hand and Arm Function after Spinal Cord Injury. *IEEE Trans.*  
382 *Neural Syst. Rehabil. Eng.* **29**, 310–319 (2021).
- 383 13. Moritz, C. *et al.* Non-invasive spinal cord electrical stimulation for arm and hand function in  
384 chronic tetraplegia : a safety and efficacy trial. *Nat. Med.* **30**, 18–24 (2024).
- 385 14. Kramer, J. K., Taylor, P., Steeves, J. D. & Curt, A. Dermatomal somatosensory evoked potentials  
386 and electrical perception thresholds during recovery from cervical spinal cord injury.  
387 *Neurorehabil. Neural Repair* **24**, 309–317 (2010).
- 388 15. Kramer, J. L. K., Moss, A. J., Taylor, P. & Curt, A. Assessment of posterior spinal cord function  
389 with electrical perception threshold in spinal cord injury. *J. Neurotrauma* **25**, 1019–1026 (2008).
- 390 16. Rupp, R. *et al.* International standards for neurological classification of spinal cord injury. *Top.*  
391 *Spinal Cord Inj. Rehabil.* **27**, 1–22 (2021).
- 392 17. Yozbatiran, N., Der-Yeghiaian, L. & Cramer, S. C. A standardized approach to performing the  
393 action research arm test. *Neurorehabil. Neural Repair* **22**, 78–90 (2008).
- 394 18. Miller, K. J. A library of human electrocorticographic data and analyses. *Nat. Hum. Behav.* **3**,  
395 1225–1235 (2019).
- 396 19. Schalk, G., McFarland, D. J., Hinterberger, T., Birbaumer, N. & Wolpaw, J. R. BCI2000: A  
397 General-Purpose Brain-Computer Interface (BCI) System. *IEEE Trans. Biomed. Eng.* **51**, 1034–  
398 1043 (2004).
- 399 20. Lawhern, V. J. *et al.* EEGNet: A compact convolutional neural network for EEG-based brain-  
400 computer interfaces. *J. Neural Eng.* **15**, (2018).
- 401 21. Schirrneister, R. T. *et al.* Deep learning with convolutional neural networks for EEG decoding

- 402 and visualization. *Hum. Brain Mapp.* **38**, 5391–5420 (2017).
- 403 22. Asboth, L. *et al.* Cortico–reticulo–spinal circuit reorganization enables functional recovery after  
404 severe spinal cord contusion. *Nat. Neurosci.* **21**, 576–588 (2018).
- 405 23. Grisolia, J. S. & Wiederholt, W. C. Short latency somatosensory evoked potentials from radial,  
406 median and ulnar nerve stimulation in man. *Electroencephalogr. Clin. Neurophysiol.* **50**, 375–  
407 381 (1980).
- 408 24. Luo, S. *et al.* Stable Decoding from a Speech BCI Enables Control for an Individual with ALS  
409 without Recalibration for 3 Months. *Adv. Sci.* **10**, 1–12 (2023).
- 410 25. Milekovic, T. *et al.* Stable long-term BCI-enabled communication in ALS and locked-in  
411 syndrome using LFP signals. *J. Neurophysiol.* **120**, 343–360 (2018).
- 412 26. Fountas, K. N. & Smith, J. R. Subdural electrode-associated complications: A 20-year experience.  
413 *Stereotact. Funct. Neurosurg.* **85**, 264–272 (2007).
- 414 27. Donati, A. R. C. *et al.* Long-Term Training with a Brain-Machine Interface-Based Gait Protocol  
415 Induces Partial Neurological Recovery in Paraplegic Patients. *Sci. Rep.* **6**, 1–16 (2016).
- 416 28. Jovanovic, L. I. *et al.* Restoration of Upper Limb Function after Chronic Severe Hemiplegia: A  
417 Case Report on the Feasibility of a Brain-Computer Interface-Triggered Functional Electrical  
418 Stimulation Therapy. *Am. J. Phys. Med. Rehabil.* **99**, e35–e40 (2020).
- 419
- 420

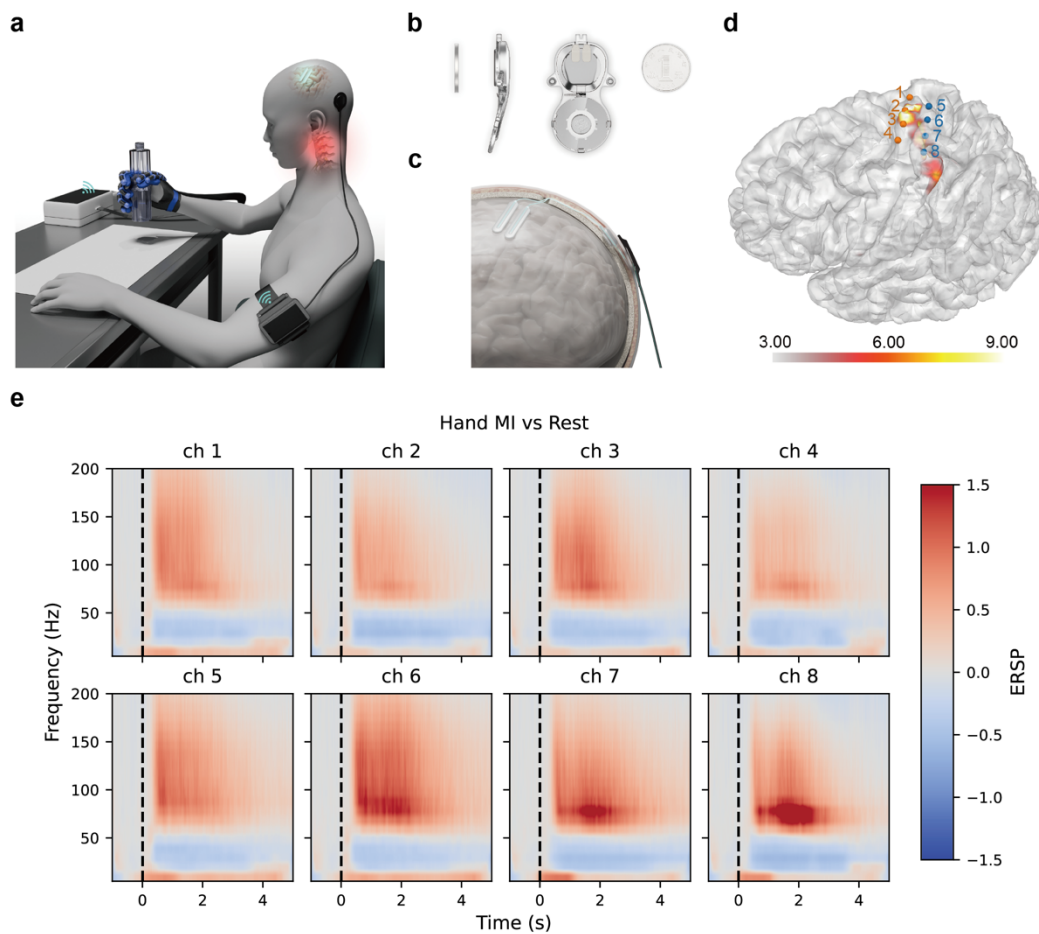

421

422 **Figure 1 NEO system design and basic signal characteristics.** a, Diagram of the NEO brain-computer  
423 interface (BCI) system. The NEO BCI system transmits epidural ECoG through a coil to an external  
424 device fixed on the patient's shoulder. The external device sends the signals to the host computer, where  
425 an algorithm decodes the patient's grasping intention and drives a pneumatic glove to grasp objects.  
426 When the patient stops imagining the grasp, the pneumatic glove is driven to open and release the object.  
427 b, Structure of the NEO implant. The upper part is the implant, and the lower part is the coil. c, Diagram  
428 of the NEO implant implantation position. The coil is magnetically attached through the skin,  
429 transmitting signals and power. Electrodes are fixed on the surface of the dura mater and connected to  
430 the implant through a skull tunnel. d, Diagram of the patient implantation position. The orange and blue  
431 dots represent the electrodes on the precentral and postcentral gyrus, respectively. The heat map  
432 overlaying the cortex represents functional MRI activation significance values (negative logarithm of p  
433 values). e, Event-related spectral perturbation (ERSP) during imagined grasping. The spectral pattern  
434 exhibits a typical dual-frequency characteristic, including low-frequency (15-50 Hz) ERD and high-  
435 frequency (>50 Hz) ERS. Hand-MI: Hand Motor Imagery.

436

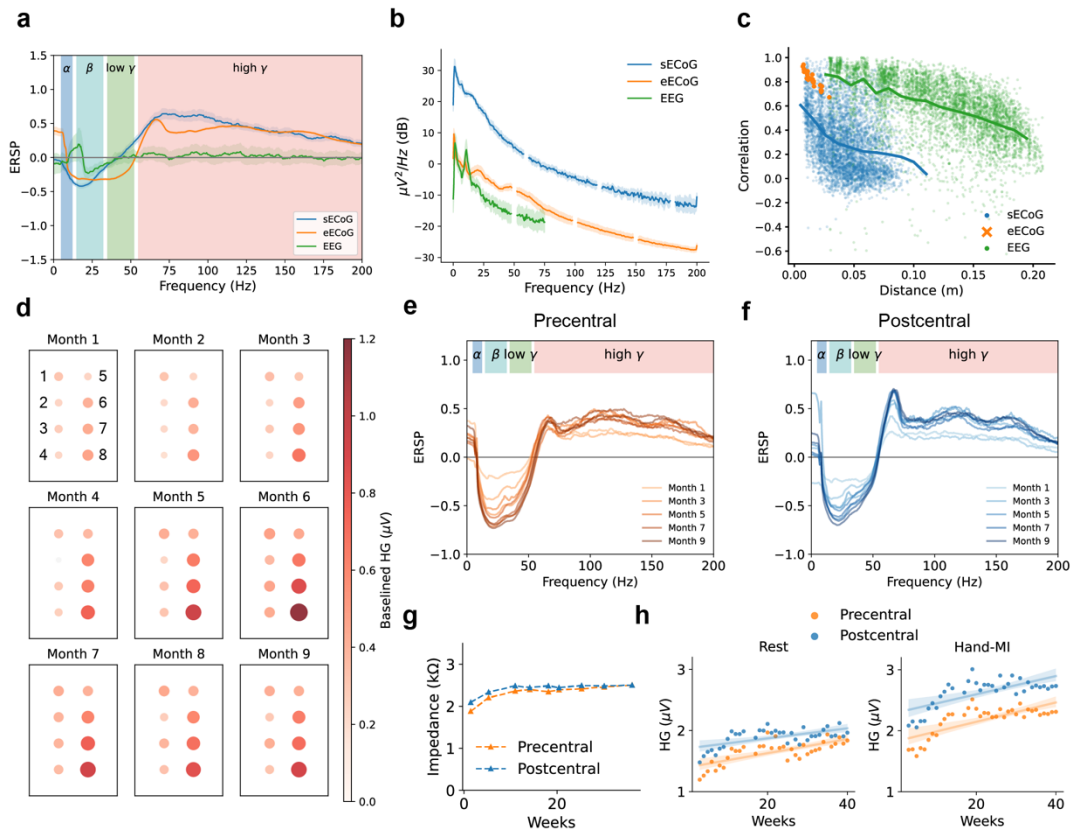

437

438 **Figure 2 Long-term spatio-temporal-spectral characteristics of epidural signals.** a, Comparison of  
 439 event-related spectral perturbations (ERSP) among subdural ECoG, epidural ECoG, and scalp EEG.  
 440 Epidural ECoG exhibits an effective frequency band range similar to subdural ECoG. b, Comparison of  
 441 PSD among the three types of electrophysiological recordings. Subdural ECoG has the highest amplitude,  
 442 and epidural ECoG has a higher amplitude in the higher frequency band (30-70 Hz) compared to scalp  
 443 EEG. The PSD excludes the frequency band of power line interference. c, Relationship between channel  
 444 signal correlation and electrode distance. d, Trend of high-frequency energy (55-95 Hz) spatial patterns  
 445 of epidural ECoG during imagined hand movements. Long-term training significantly enhances high-  
 446 frequency activity in the ECoGs of all channels during motor imagery (Month 1 vs. Month 6,  $p < 0.001$ ,  
 447 independent t-test). Channels where the HG response is not significantly greater than zero are marked  
 448 as gray. e-f, Trend of the average ERSP of precentral and postcentral electrodes, with each curve  
 449 representing the average ERSP of one month's hand motor imagery data. Both low-frequency ERD and  
 450 high-frequency ERS gradually increase with training. g, Impedance changes of precentral and postcentral  
 451 electrodes. h, Trend in high-frequency energy (55-95 Hz, un-baselined) of precentral and postcentral  
 452 electrodes during rest and hand motor imagery, both showing significant positive correlations (resting:  
 453  $r = 0.67$ ,  $p < 0.001$ ; motor imagery:  $r = 0.73$ ,  $p < 0.001$ ). In a, b, and c, subdural ECoG data are from the Kai  
 454 Miller dataset<sup>18</sup>; a and b use scalp EEG from the patient's own recordings; c uses scalp EEG from the  
 455 BCI2000 dataset<sup>19</sup>. Hand-MI: Hand Motor Imagery. HG: High-Gamma band power.



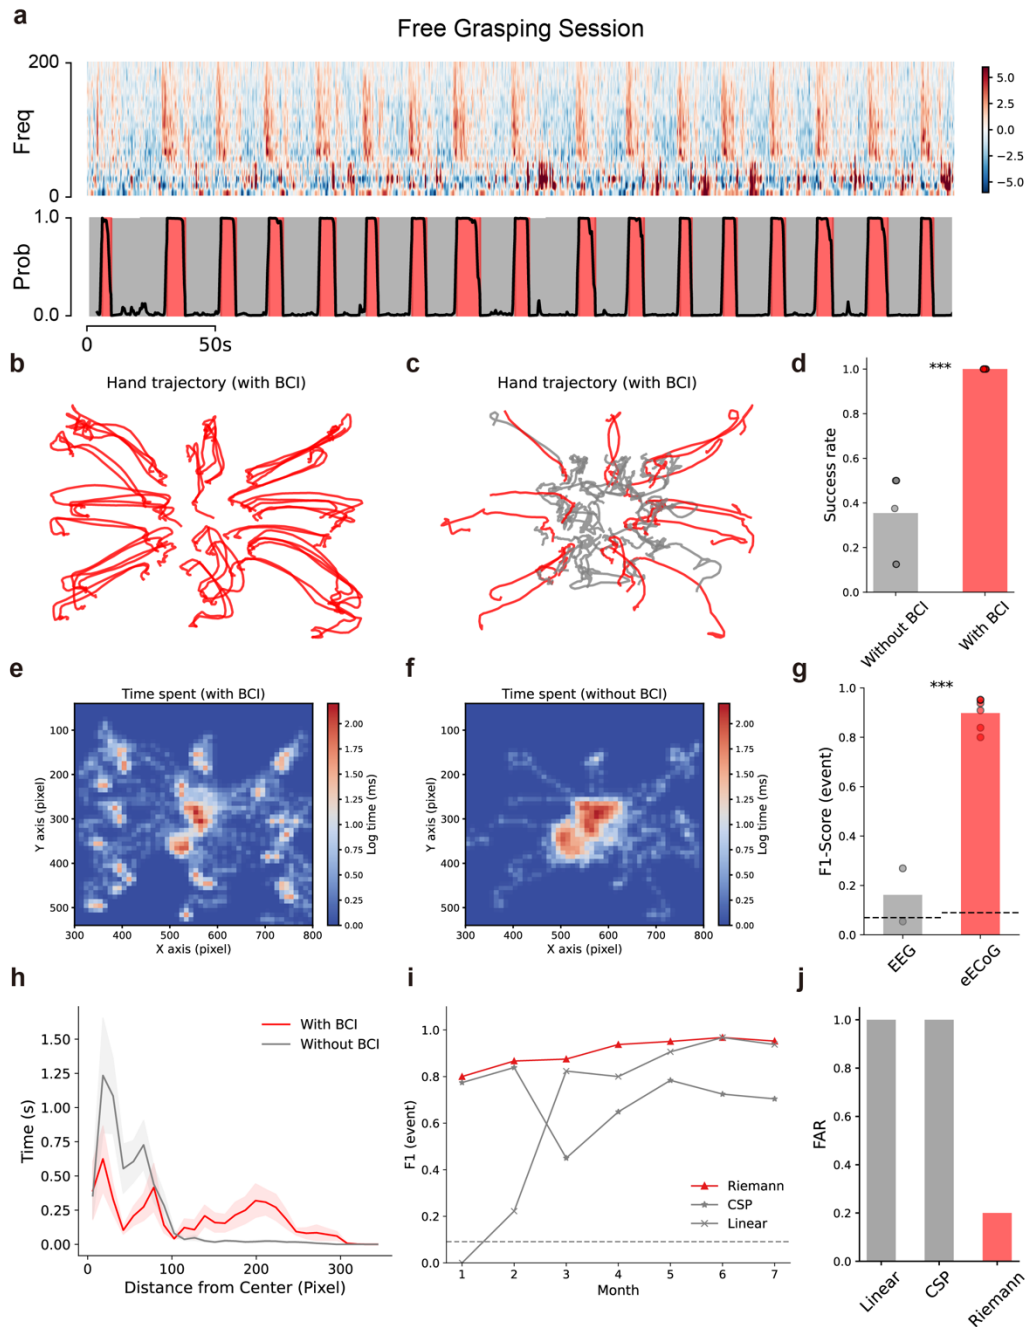

456

457 **Figure 3 Minimally invasive epidural brain-computer interface (BCI) for motor assistance.** a,  
 458 Example of BCI testing data and decoded confidences. The red shading indicates the time range of the  
 459 grasping action as determined by the decoder. The grasping action has a high single-trial signal-to-noise  
 460 ratio. b-c, Hand movement trajectories of the patient performing the BCI testing task with BCI assistance  
 461 (b) or unaided (c), recorded by a top-down camera and identified by a keypoint detection model. d, With  
 462 BCI assistance, the patient's success rate of moving the object to the designated position within 10  
 463 seconds is 100%, whereas, without BCI assistance, the success rate is only 35%. e-f, Logarithmic spatial  
 464 distribution of the time spent with BCI assistance (e) or unaided (f). With BCI assistance, the time spent  
 465 is clustered in the target start and end points, while unaided, the time was mostly spent in the start area.  
 466 g, Comparison of F1 scores for detecting grasping events using epidural ECoG and scalp EEG. The black  
 467 dashed line represents the chance level. Epidural ECoG detection F1 scores are significantly higher than

468 those of scalp EEG. h, Distribution of the relationship between time spent and distance to the central start  
469 point. With BCI assistance, the patient can pick up the object and move to the edge more quickly. i,  
470 Changes in the F1 score of the decoding algorithm for detecting grasping events over 7 months. The  
471 Riemannian geometry-based decoding method shows long-term stability, outperforming the control  
472 linear method and CSP method. The gray dashed line represents the chance level. j, Robustness of  
473 different models to electromyographic (EMG) noise generated by chewing during daily use. Due to its  
474 high specificity to spatial patterns, the Riemannian geometry method shows greater robustness to EMG  
475 noise from chewing, which has a different spatial pattern from grasping, compared to the linear method  
476 and the CSP method. FAR: False Activation Rate.  
477

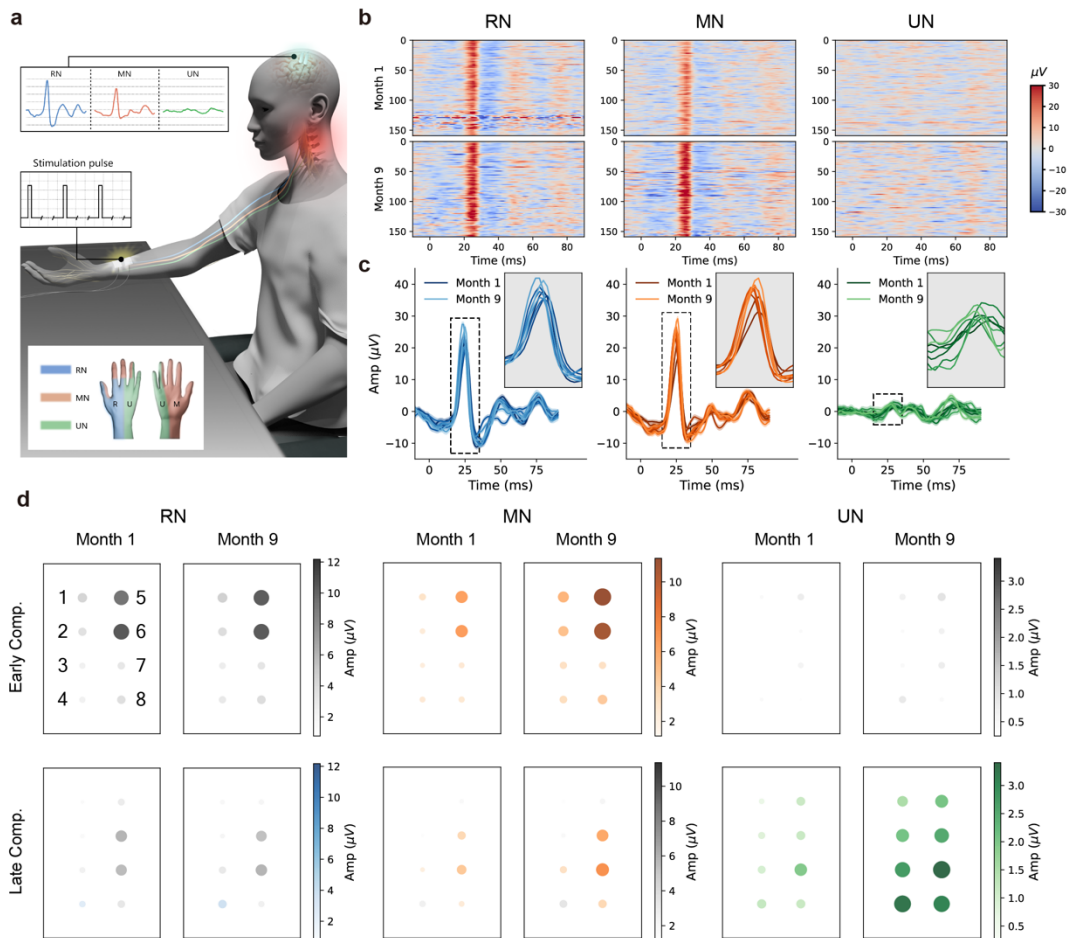

478

479 **Figure 4 Electrophysiological rehabilitation assessments.** a, Diagram of sensory evoked potential (SEP)  
 480 measurement. Functional stimulators were used to stimulate the patient's radial, median, and ulnar nerves,  
 481 and SEP activities were recorded from NEO epidural electrodes. b, Trial images of SEP waveforms  
 482 (channel 5) for the patient's radial nerve (left), median nerve (center), and ulnar nerve (right) at the 1<sup>st</sup>  
 483 and 9<sup>th</sup> months. c, SEP waveforms over 9 months, with colors from dark to light representing SEP  
 484 waveforms over the 9 months (channel 5). d, Changes in average amplitude of early SEP components  
 485 (15-35 ms) and late SEP components (40-80 ms) at different electrodes from the 1<sup>st</sup> month to the 9<sup>th</sup>  
 486 month. Electrodes with no significant enhancement ( $p > 0.05$ , FDR-corrected) were marked in gray. MN:  
 487 median nerve; RN: radial nerve; UN: ulnar nerve.  
 488

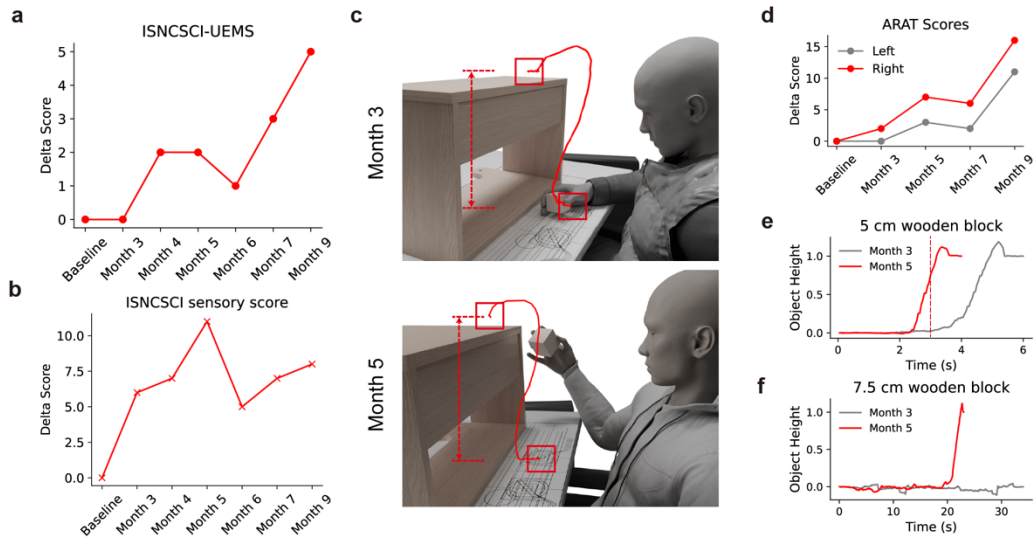

489

490 **Figure 5 Functional rehabilitation assessments.** a, Changes in key muscle strength in the upper limbs  
491 according to the ISNCSCI scale. b, Changes in sensory scores of the ISNCSCI scale. Sensory scores  
492 encountered a considerable decrease in the 6<sup>th</sup> month due to the patient's use of antispasmodic medication.  
493 c, The patient grasping and releasing a 5 cm block in the Action Research Arm Test (ARAT) test at the  
494 3rd and 5th months. The red curve represents the block trajectory, the boxes mark the start and end points,  
495 and the dashed lines indicate the height of the lift. d, Changes in ARAT scores over the course of training.  
496 e-f, Curves for lift heights over time of 5 cm and 7.5 cm block grasp tasks in ARAT at the 3rd and 5th  
497 months, with the red dashed line indicating the time point shown in h. Trajectories were obtained from  
498 video recordings and manually annotated.

499

500

501 **Video 1 NEO System Overview.**

502 This video outlines the basic setup of the NEO brain-computer interface (BCI) system. First, the  
503 NEO implant is powered on. Next, the pneumatic hand is attached and configured. Once connected  
504 to the controller, the NEO system transmits epidural ECoG signals in real-time. Finally, the subject  
505 is able to control the pneumatic hand using his thoughts. Link to view online:

506 <https://cloud.tsinghua.edu.cn/f/af0fb0644b43496fa4e7/>

507

508 **Video 2 ARAT Grasping Test.**

509 This video demonstrates the subject's improvement in hand function following a 9-month training  
510 period. It compares the subject's performance on ARAT tasks before surgery (baseline) and at the  
511 9-month mark for both hands. For the right hand, grasping tasks involving 2.5 cm, 5 cm, and 7.5  
512 cm cubes, as well as a 7.5 cm sphere, are compared between the baseline and 9th month. For the  
513 left hand, the grasping task with a sharpening stone is evaluated. Link to view online:

514 <https://cloud.tsinghua.edu.cn/f/958b6cad79dd42c4ad12/>

515

516 **Video 3 NEO for Hand Function Assistance.**

517 This video demonstrates how the NEO system assists in hand function. With the help of the BCI  
518 system, the subject successfully lifts a bottle of water and moves it to the designated target area.  
519 Link to view online:

520 <https://cloud.tsinghua.edu.cn/f/e8661aa219b14a988a43/>

521

522 **Video 4 NEO for Independent Home Use.**

523 This video highlights how the NEO system enhances the subject's daily life. Using the NEO system,  
524 the subject can independently eat with a customized fork and drink from either a plastic bottle or  
525 glass. Link to view online:

526 <https://cloud.tsinghua.edu.cn/f/836149c8500441c3abd8/>

527
